# Supplementary material for: Novel Loci for Metabolic Networks and Multi-Tissue Expression Studies Reveal Genes for Atherosclerosis
Source: PubMed Central journal article supplement (PMC3420921; doi:10.1371/journal.pgen.1002907), 2012-08-16

## SECTION DESCRIBING METABOLIC NETWORKS

### *Metabolite Network 1*

Composition of network (N = 49):

| <b>Metabolite abbreviation</b> | <b>Full description</b>                    |
|--------------------------------|--------------------------------------------|
| M-VLDL-C                       | Total cholesterol in medium VLDL           |
| M-VLDL-CE                      | Cholesterol esters in medium VLDL          |
| S-VLDL-P                       | Concentration of small VLDL particles      |
| S-VLDL-L                       | Total lipids in small VLDL                 |
| S-VLDL-PL                      | Phospholipids in small VLDL                |
| S-VLDL-C                       | Total cholesterol in small VLDL            |
| S-VLDL-FC                      | Free cholesterol in small VLDL             |
| XS-VLDL-P                      | Concentration of very small VLDL particles |
| XS-VLDL-L                      | Total lipids in very small VLDL            |
| XS-VLDL-PL                     | Phospholipids in very small VLDL           |
| XS-VLDL-TG                     | Triglycerides in very small VLDL           |
| IDL-P                          | Concentration of IDL particles             |
| IDL-L                          | Total lipids in IDL                        |
| IDL-PL                         | Phospholipids in IDL                       |
| IDL-C                          | Total cholesterol in IDL                   |
| IDL-FC                         | Free cholesterol in IDL                    |
| IDL-TG                         | Triglycerides in IDL                       |
| L-LDL-P                        | Concentration of large LDL particles       |
| L-LDL-L                        | Total lipids in large LDL                  |
| L-LDL-PL                       | Phospholipids in large LDL                 |
| L-LDL-C                        | Total cholesterol in large LDL             |
| L-LDL-CE                       | Cholesterol esters in large LDL            |
| L-LDL-FC                       | Free cholesterol in large LDL              |
| M-LDL-P                        | Concentration of medium LDL particles      |
| M-LDL-L                        | Total lipids in medium LDL                 |
| M-LDL-PL                       | Phospholipids in medium LDL                |
| M-LDL-C                        | Total cholesterol in medium LDL            |
| M-LDL-CE                       | Cholesterol esters in medium LDL           |
| S-LDL-P                        | Concentration of small LDL particles       |
| S-LDL-L                        | Total lipids in small LDL                  |
| S-LDL-C                        | Total cholesterol in small LDL             |
| XL-HDL-TG                      | Triglycerides in very large HDL            |
| S-HDL-TG                       | Triglycerides in small HDL                 |
| LDL-C                          | Total cholesterol in LDL                   |
| Serum-C                        | Serum total cholesterol                    |
| MobCH                          | Double bond protons of mobile lipids       |
| MobCH2                         | CH2 groups of mobile lipids                |
| MobCH3                         | CH3 groups of mobile lipids                |
| Est-C                          | Esterified cholesterol                     |
| Free-C                         | Free cholesterol                           |
| FAw67                          | Omega-6 and -7 fatty acids                 |
| FAw9S                          | Omega-9 and saturated fatty acids          |
| Tot-FA                         | Total fatty acids                          |
| LA                             | 18:2, linoleic acid (LA)                   |

SM  
 IDL-C-eFR  
 LDL-C-eFR  
 ApoB  
 HDL3-C

Sphingomyelins and other sphingolipids  
 Total cholesterol in IDL (Lipido)  
 Total cholesterol in LDL (Lipido)  
 Apolipoprotein B (Lipido)  
 Total cholesterol in HDL3 (Lipido)

**Intra-correlation of network:**

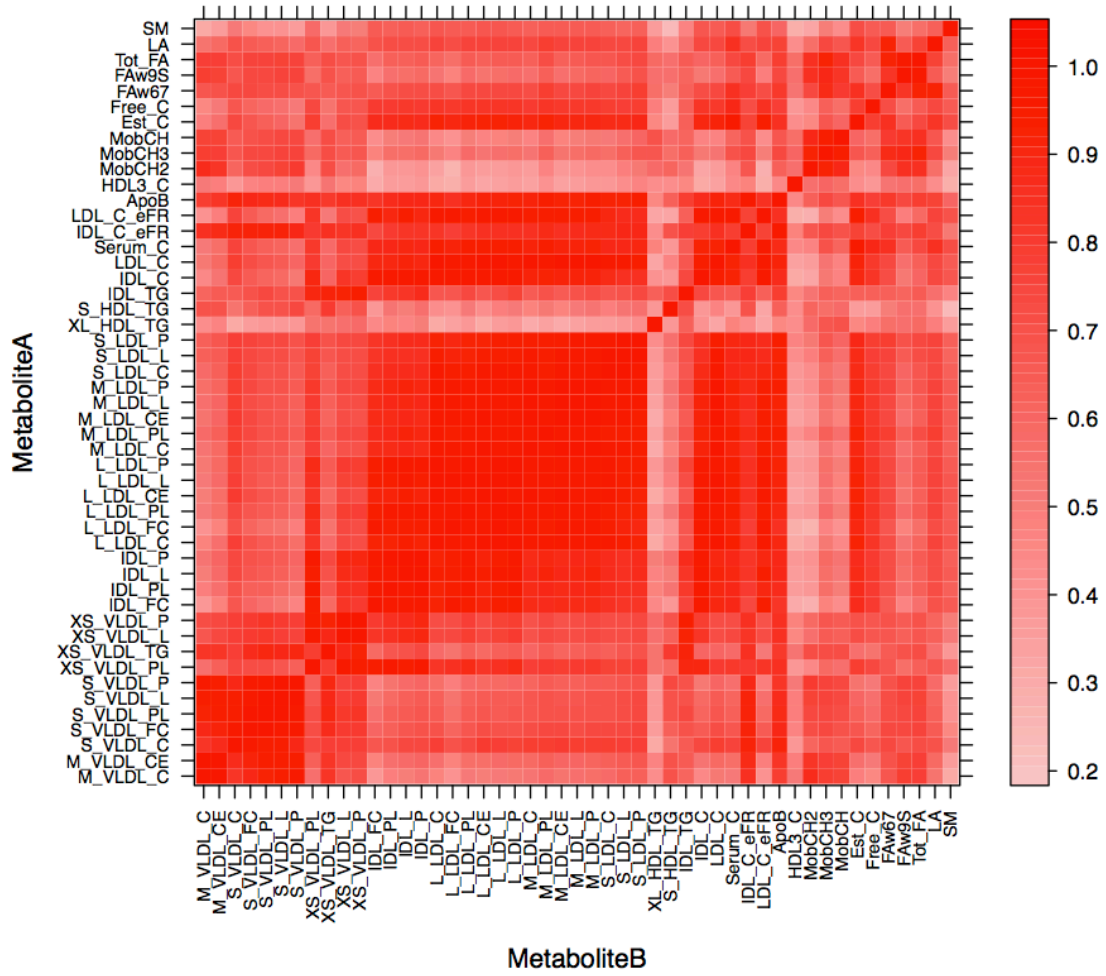

**QQ plots:**

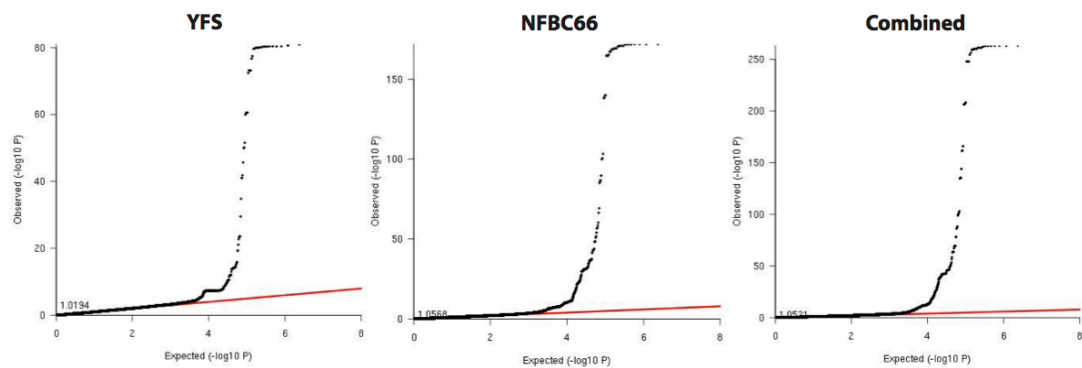

**Comparison of multivariate and univariate  $P$  values:**

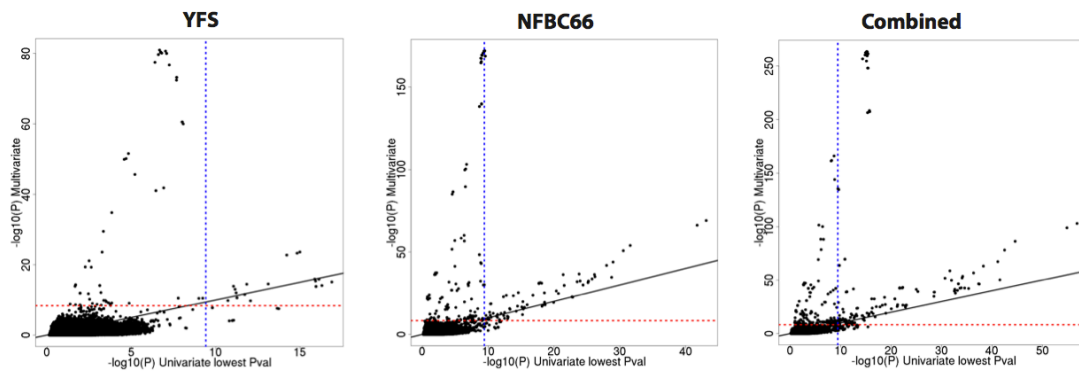

**Genome-wide Manhattan plot for combined analysis:**

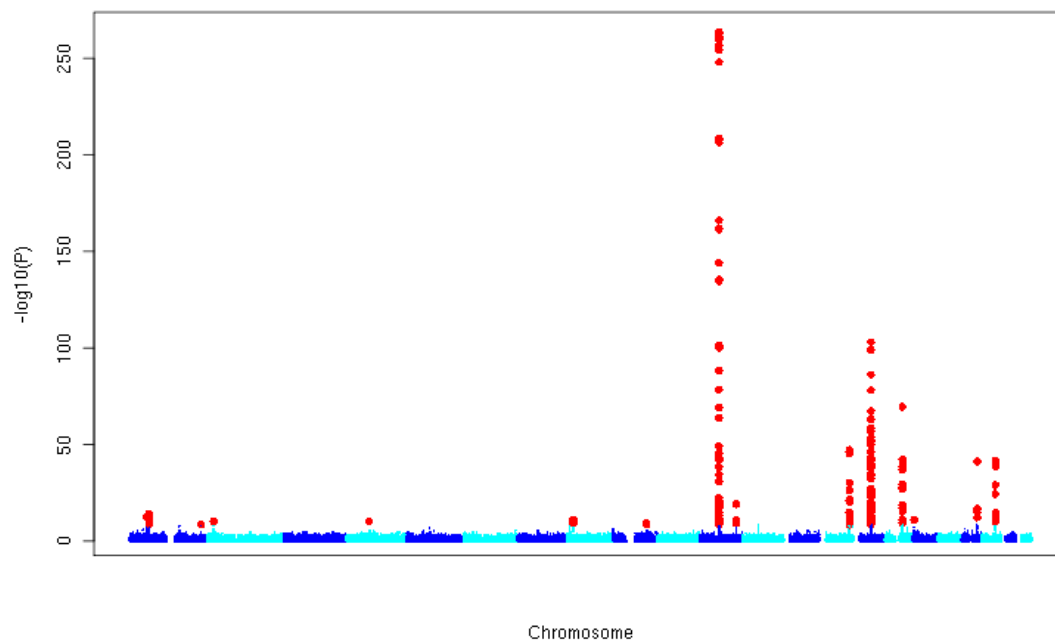

**Regional Manhattan plots for combined analysis of novel regions:**

**AQP9 locus – Metabolite network 1**

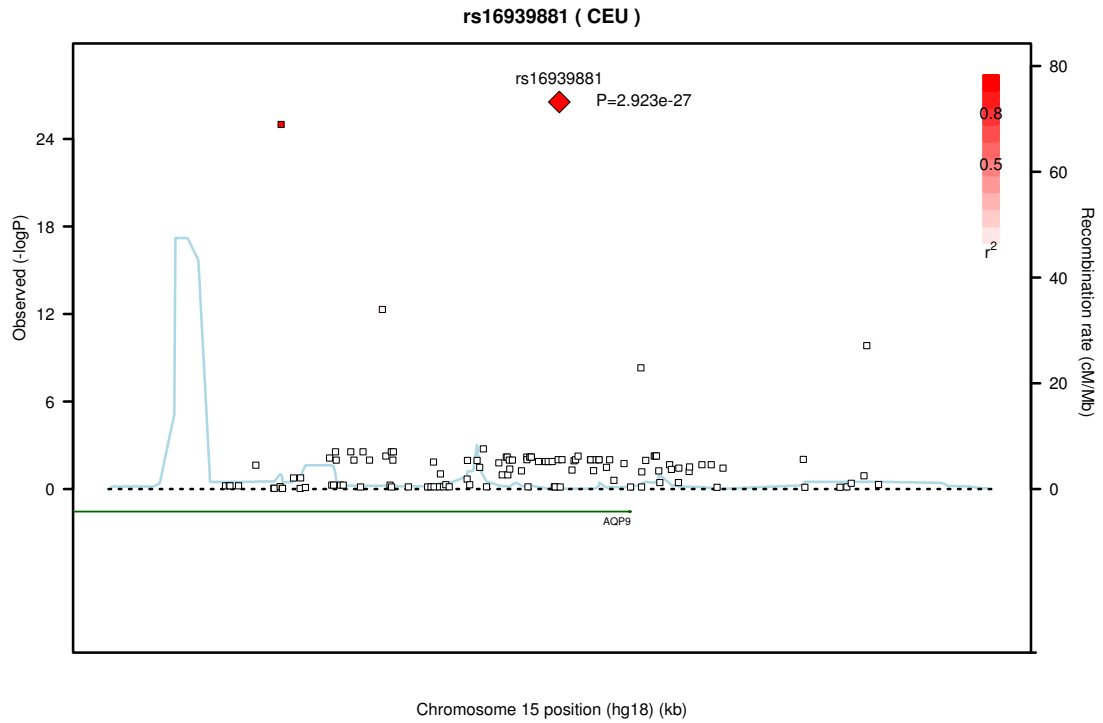

**GC locus – Metabolite network 1**

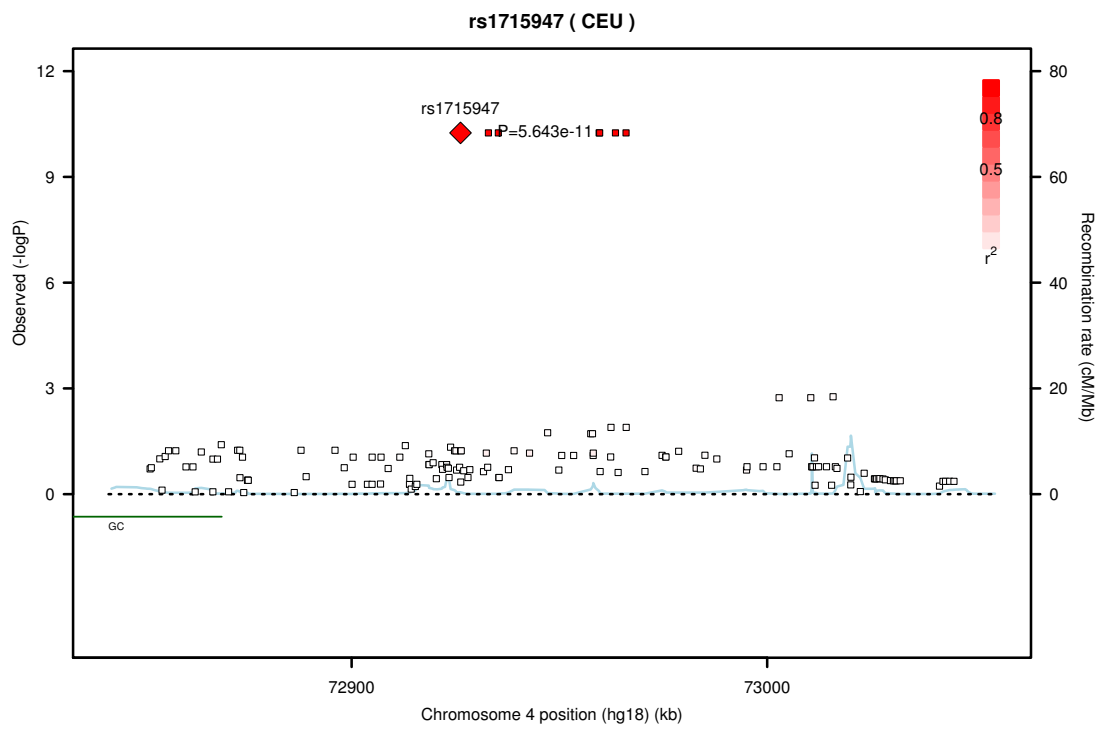

***SERPINA1* locus – Metabolite network 1**

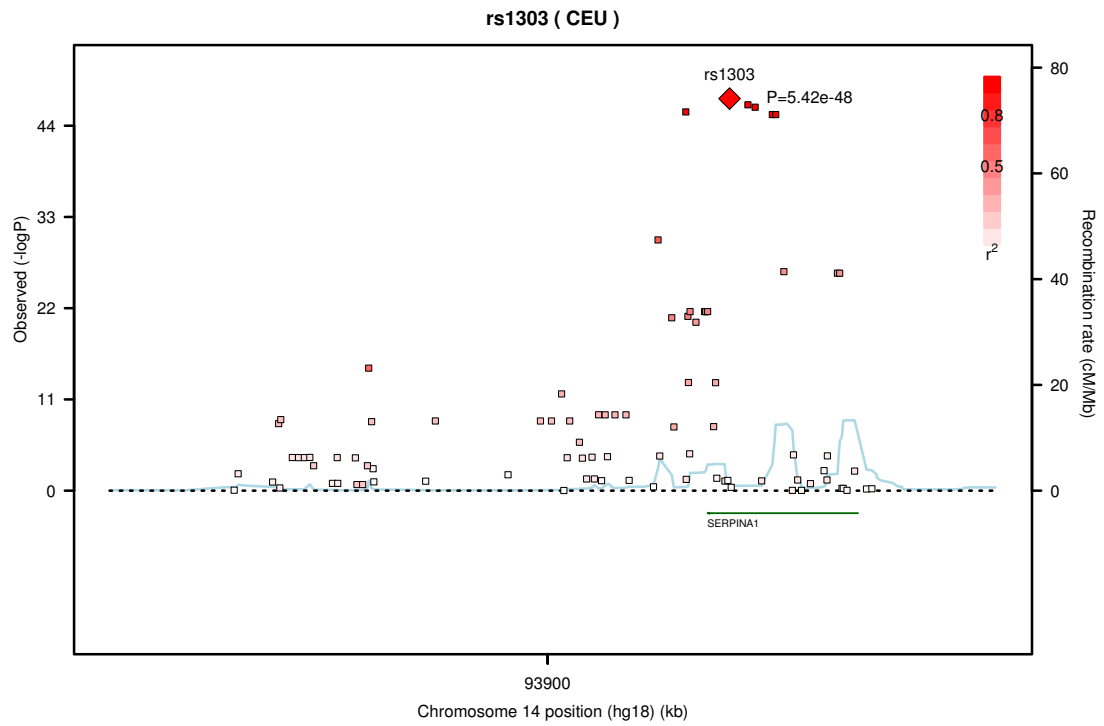

**Metabolite Network 2****Composition of network (N = 33):**

| <b>Metabolite abbreviation</b> | <b>Full description</b>                                          |
|--------------------------------|------------------------------------------------------------------|
| XXL-VLDL-P                     | Concentration of chylomicrons and extremely large VLDL particles |
| XXL-VLDL-L                     | Total lipids in chylomicrons and extremely large VLDL            |
| XXL-VLDL-PL                    | Phospholipids in chylomicrons and extremely large VLDL           |
| XXL-VLDL-TG                    | Triglycerides in chylomicrons and extremely large VLDL           |
| XL-VLDL-P                      | Concentration of very large VLDL particles                       |
| XL-VLDL-L                      | Total lipids in very large VLDL                                  |
| XL-VLDL-PL                     | Phospholipids in very large VLDL                                 |
| XL-VLDL-TG                     | Triglycerides in very large VLDL                                 |
| L-VLDL-P                       | Concentration of large VLDL particles                            |
| L-VLDL-L                       | Total lipids in large VLDL                                       |
| L-VLDL-PL                      | Phospholipids in large VLDL                                      |
| L-VLDL-C                       | Total cholesterol in large VLDL                                  |
| L-VLDL-CE                      | Cholesterol esters in large VLDL                                 |
| L-VLDL-FC                      | Free cholesterol in large VLDL                                   |
| L-VLDL-TG                      | Triglycerides in large VLDL                                      |
| M-VLDL-P                       | Concentration of medium VLDL particles                           |
| M-VLDL-L                       | Total lipids in medium VLDL                                      |
| M-VLDL-PL                      | Phospholipids in medium VLDL                                     |
| M-VLDL-FC                      | Free cholesterol in medium VLDL                                  |
| M-VLDL-TG                      | Triglycerides in medium VLDL                                     |
| S-VLDL-TG                      | Triglycerides in small VLDL                                      |
| VLDL-TG                        | Triglycerides in VLDL                                            |
| Serum-TG                       | Serum total triglycerides                                        |
| Gp                             | Glycoprotein acetyls, mainly $\alpha$ 1-acid glycoprotein        |
| Ile                            | Isoleucine                                                       |
| Leu                            | Leucine                                                          |
| Phe                            | Phenylalanine                                                    |
| Tyr                            | Tyrosine                                                         |
| Val                            | Valine                                                           |
| Tot-TG                         | Total triglycerides                                              |
| VLDL-D                         | Mean diameter for VLDL particles                                 |
| VLDL-TG-eFR                    | Triglycerides in VLDL (Lipido)                                   |
| CH2/DB                         | Average number of methylene groups per a double bond             |

**Intra-correlation of network:**

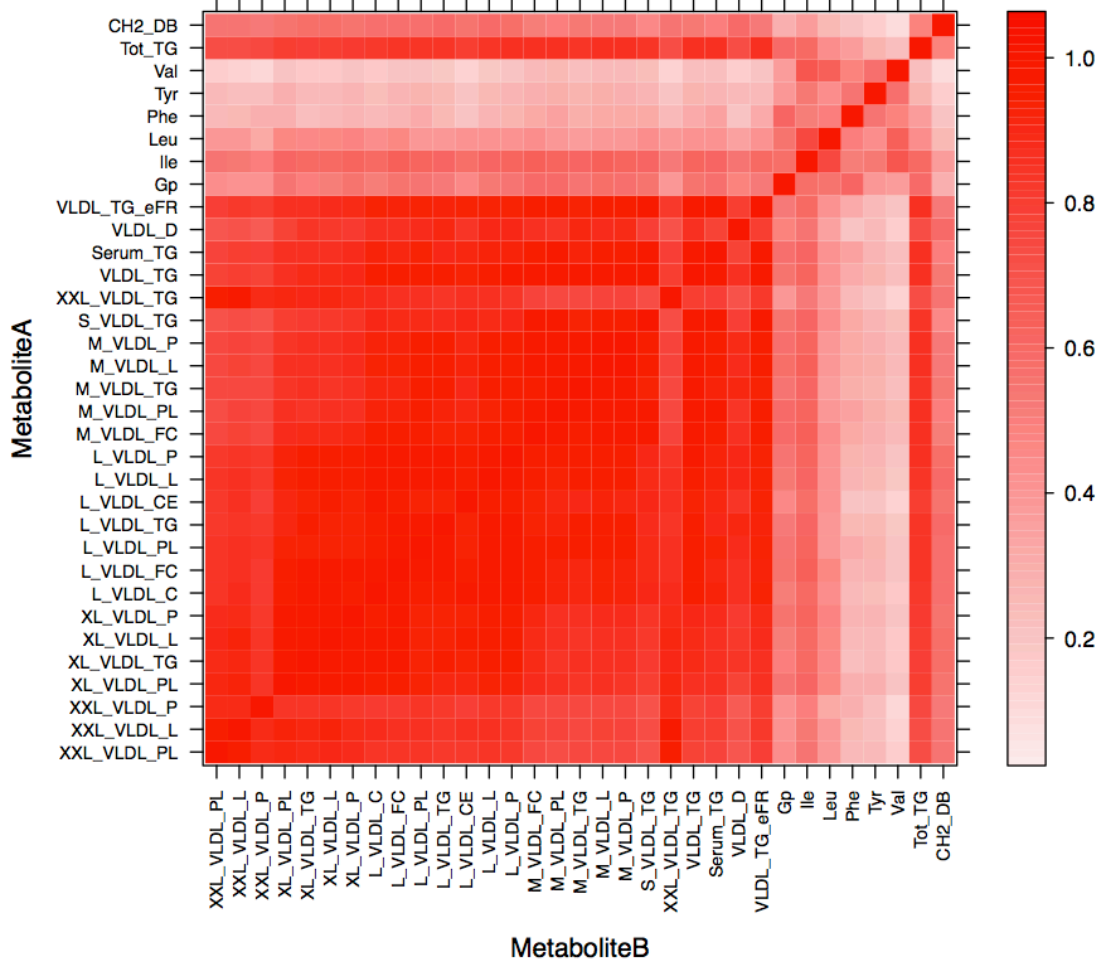

**QQ plots:**

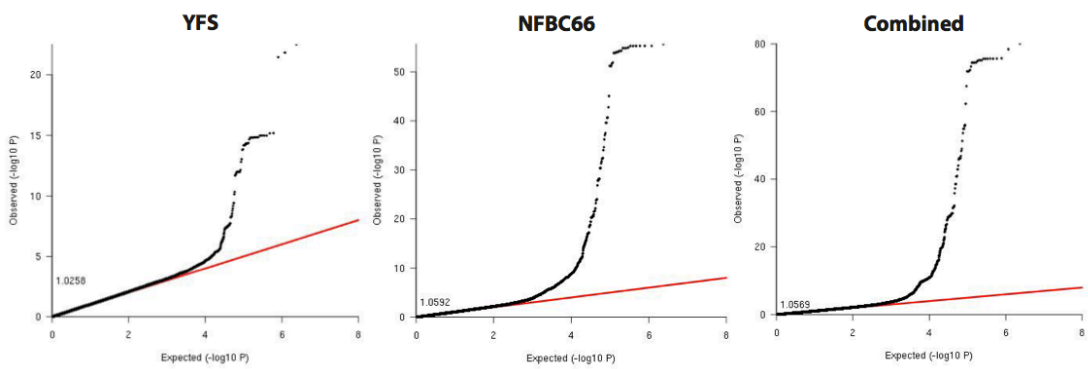

**Comparison of multivariate and univariate  $P$  values:**

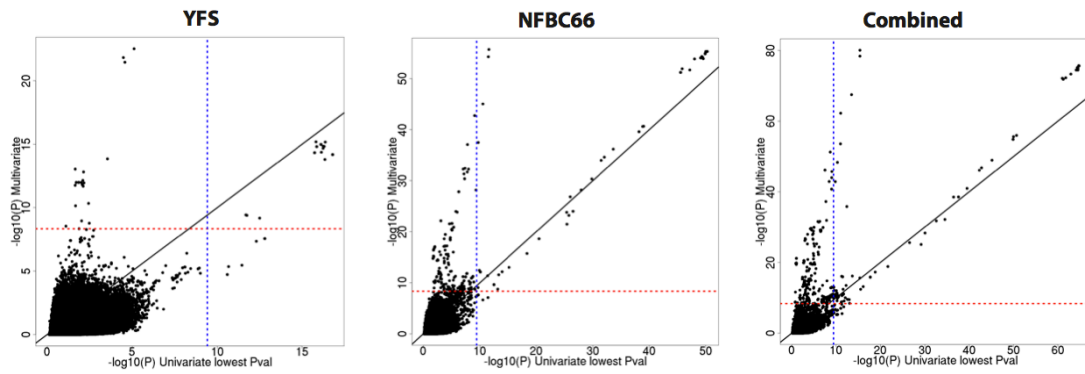

**Genome-wide Manhattan plot for combined analysis:**

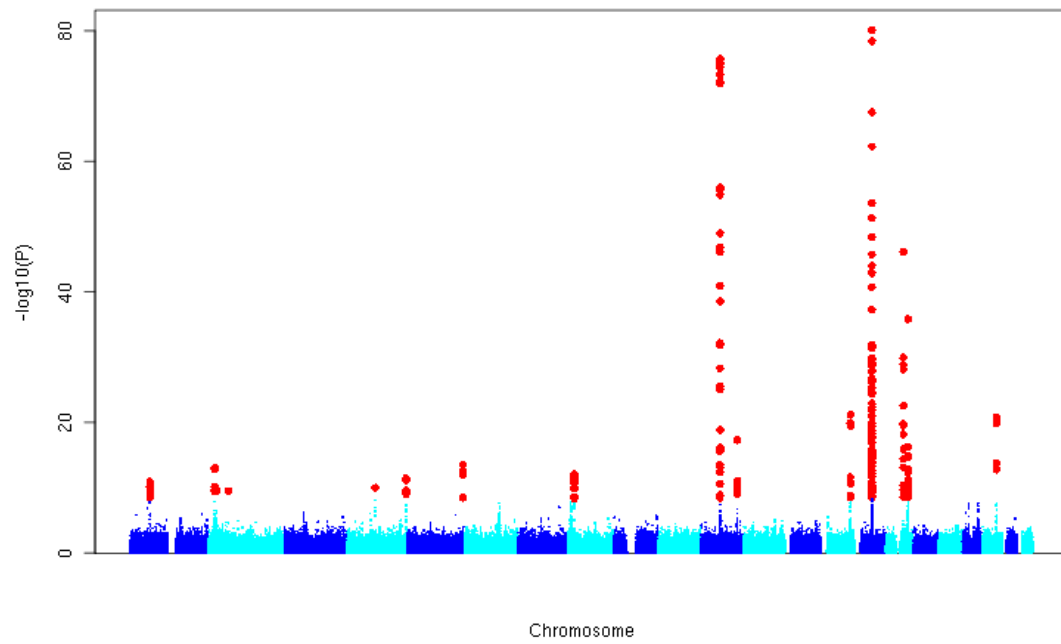



**Regional Manhattan plots for combined analysis of novel regions:**

***AQP9* locus – Metabolite network 2**

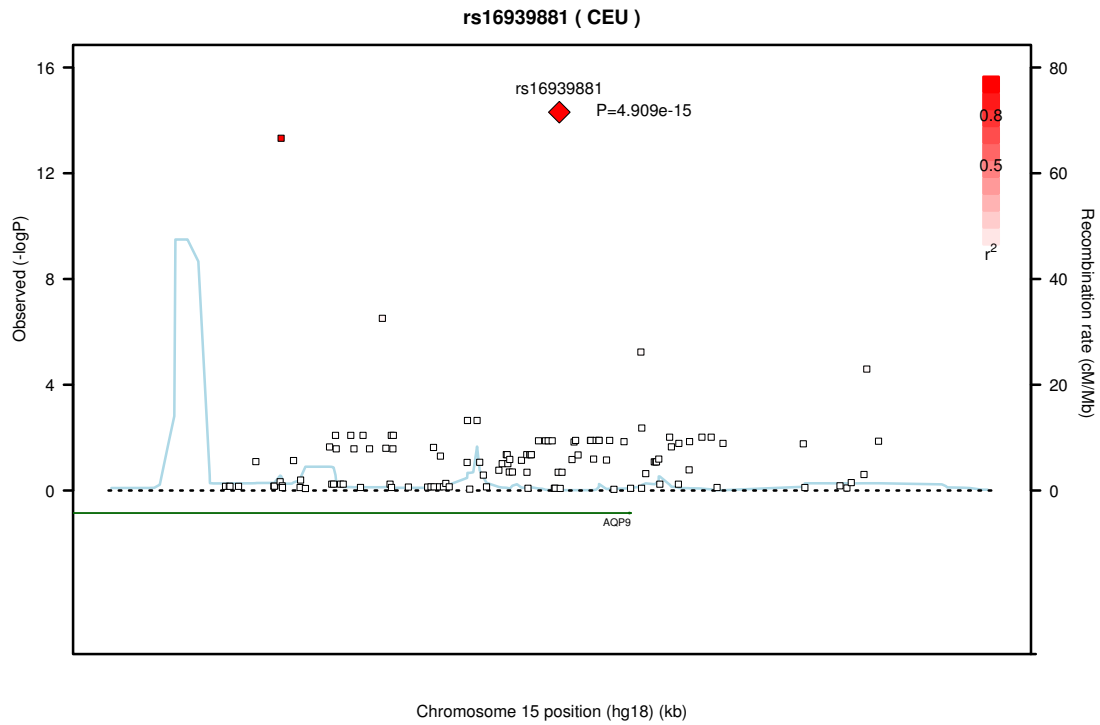

***MYO1E, CCNB2, RNF111* locus – Metabolite network 2**

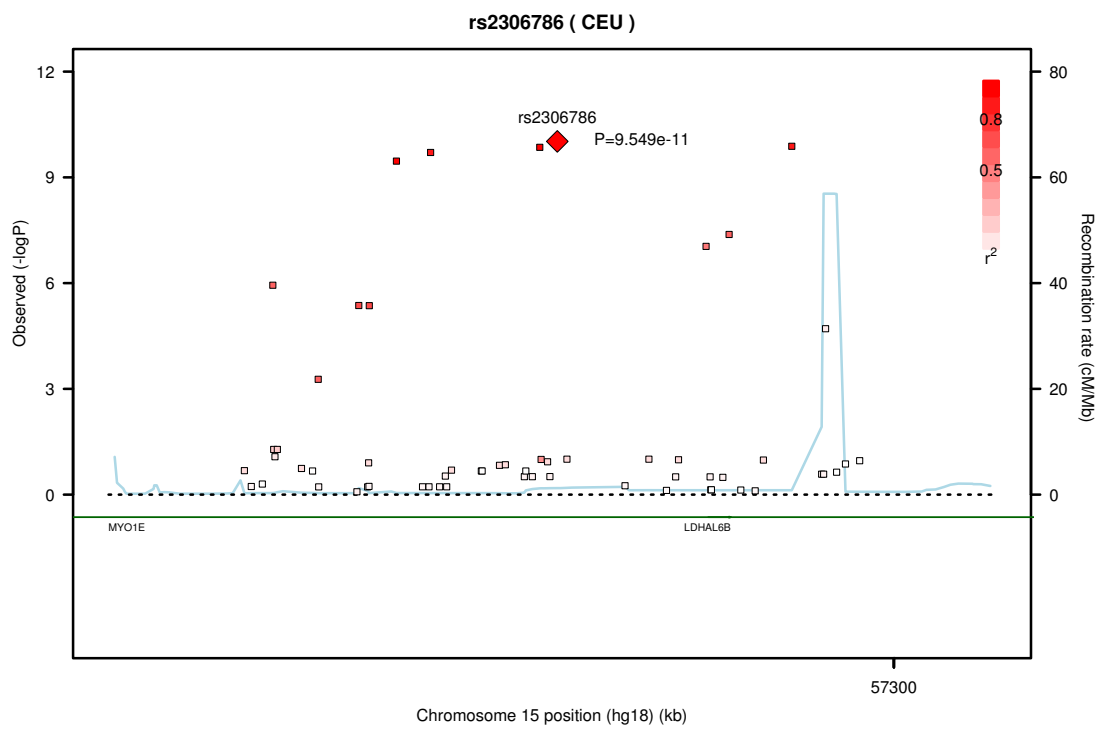

**SERPINA1 locus – Metabolite network 2**

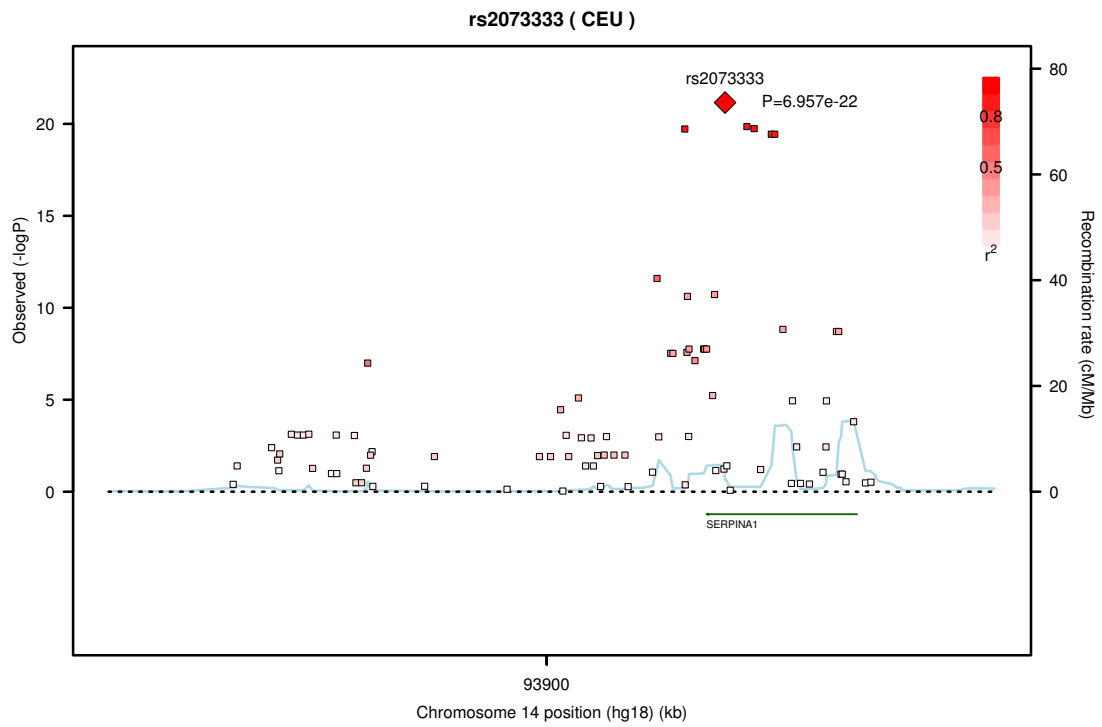

**ZFH3 locus – Metabolite network 2**

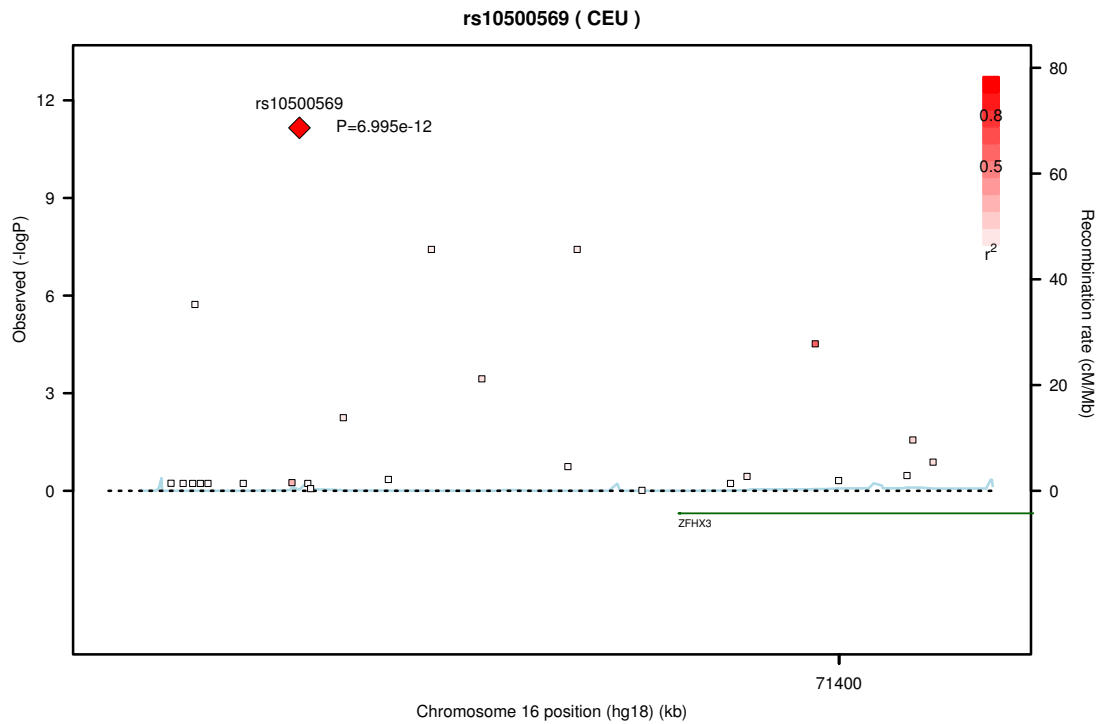

### Metabolite Network 3

Composition of network (N = 15):

| Metabolite abbreviation | Full description                          |
|-------------------------|-------------------------------------------|
| XL-HDL-P                | Concentration of very large HDL particles |
| XL-HDL-L                | Total lipids in very large HDL            |
| XL-HDL-PL               | Phospholipids in very large HDL           |
| XL-HDL-C                | Total cholesterol in very large HDL       |
| XL-HDL-CE               | Cholesterol esters in very large HDL      |
| XL-HDL-FC               | Free cholesterol in very large HDL        |
| L-HDL-P                 | Concentration of large HDL particles      |
| L-HDL-L                 | Total lipids in large HDL                 |
| L-HDL-PL                | Phospholipids in large HDL                |
| L-HDL-C                 | Total cholesterol in large HDL            |
| L-HDL-CE                | Cholesterol esters in large HDL           |
| L-HDL-FC                | Free cholesterol in large HDL             |
| HDL-C                   | Total cholesterol in HDL                  |
| HDL-D                   | Mean diameter for HDL particles           |
| HDL2-C                  | Total cholesterol in HDL2 (Lipido)        |

Intra-correlation of network:

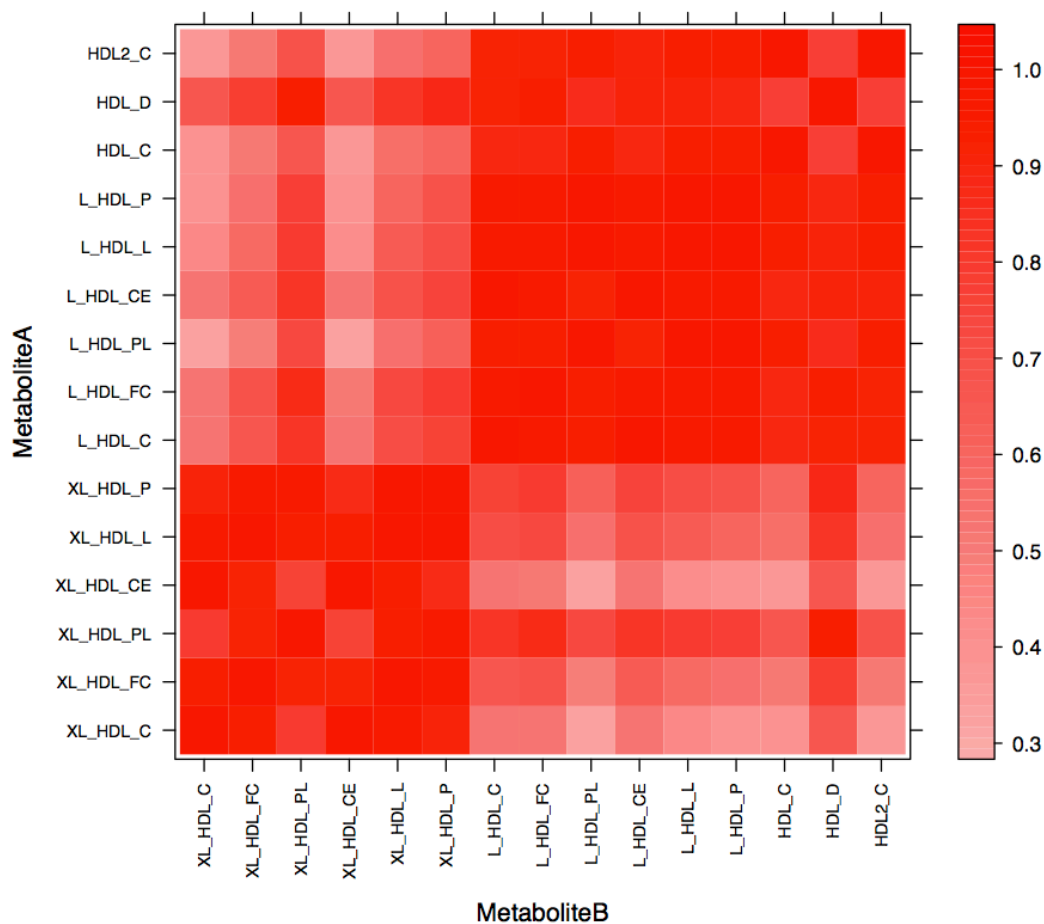

**QQ plots:**

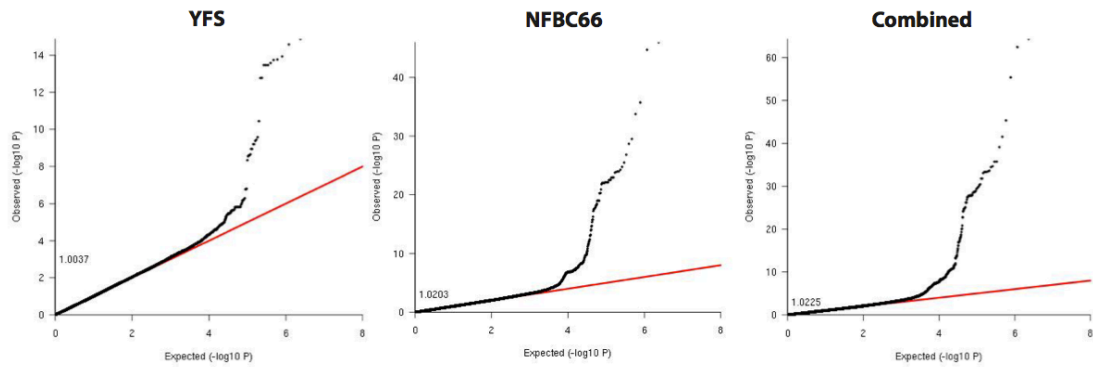

**Comparison of multivariate and univariate  $P$  values from combined analysis:**

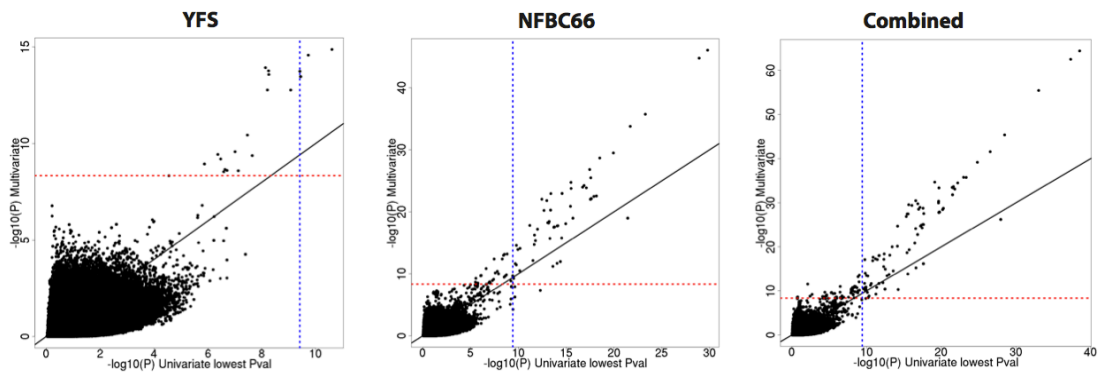

**Genome-wide Manhattan plot for combined analysis:**

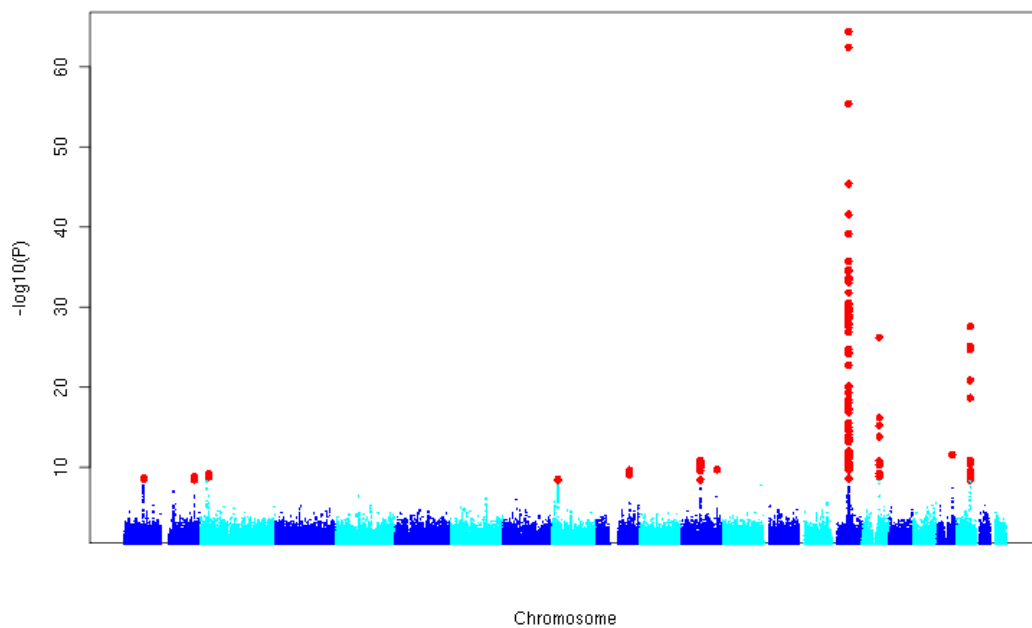

**Regional Manhattan plots for combined analysis of novel regions:**

***AQP9* locus – Metabolite network 3**

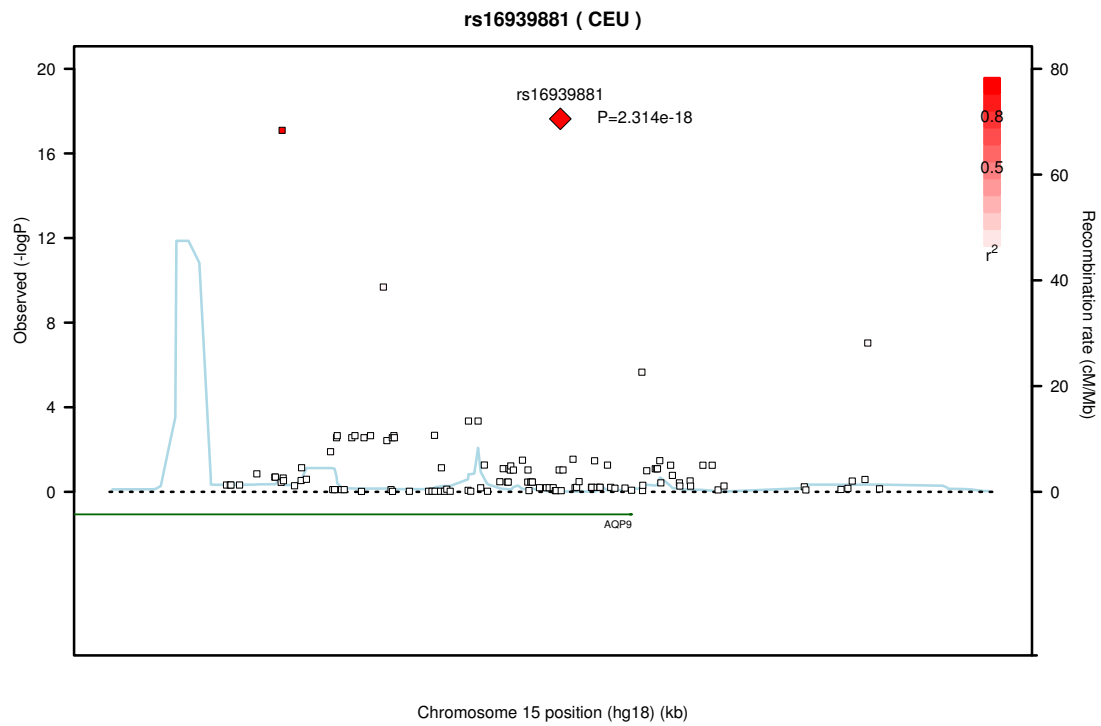



**QQ plots:**

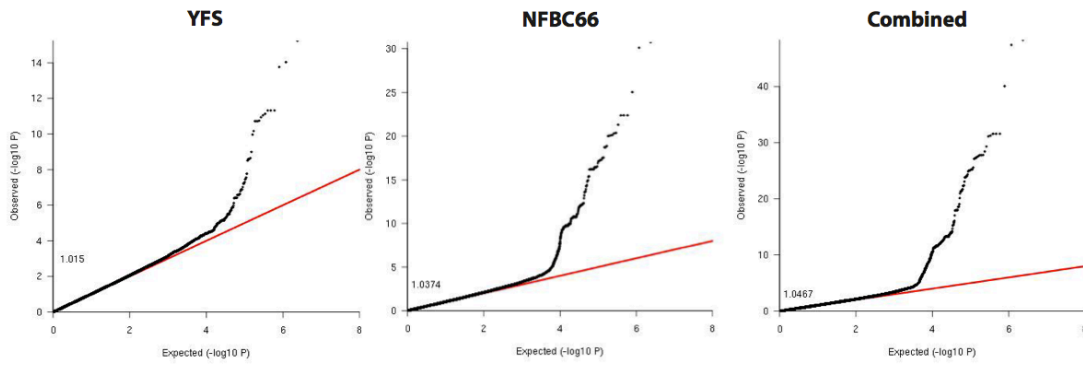

**Comparison of multivariate and univariate P values:**

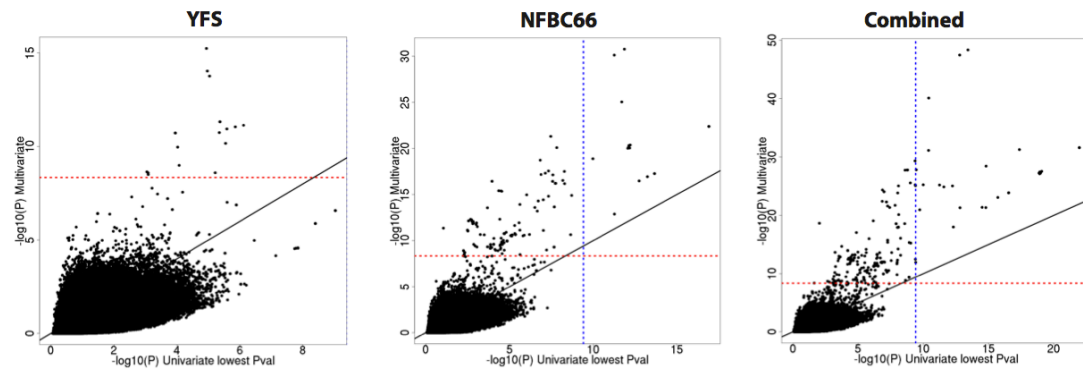

**Genome-wide Manhattan plot for combined analysis:**

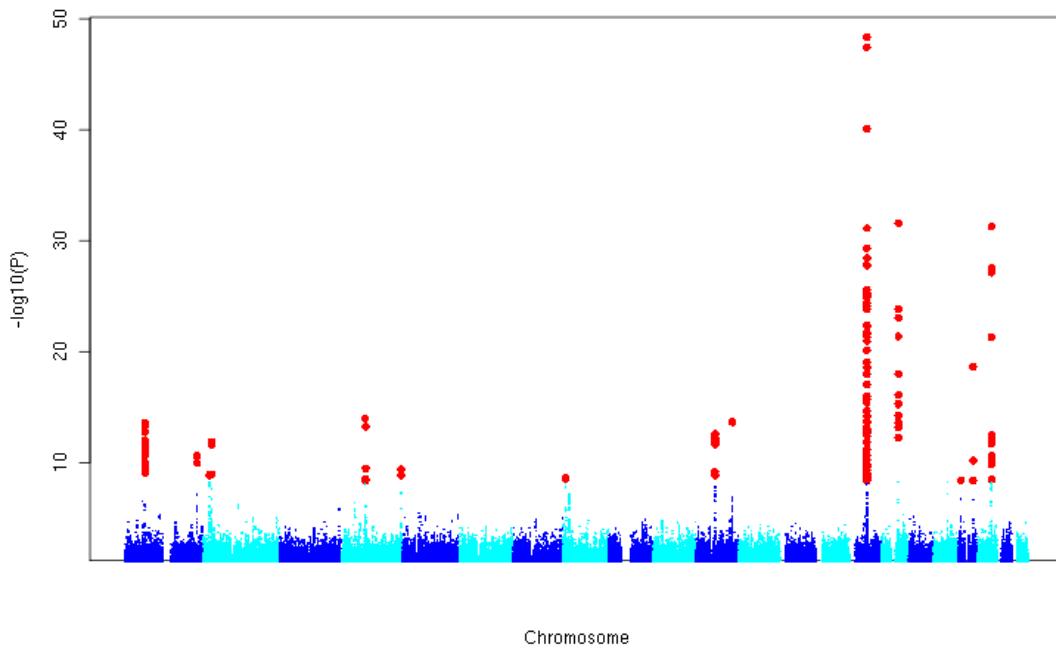

**Regional Manhattan plots for combined analysis of novel regions:**

***AQP9* locus – Metabolite network 4**

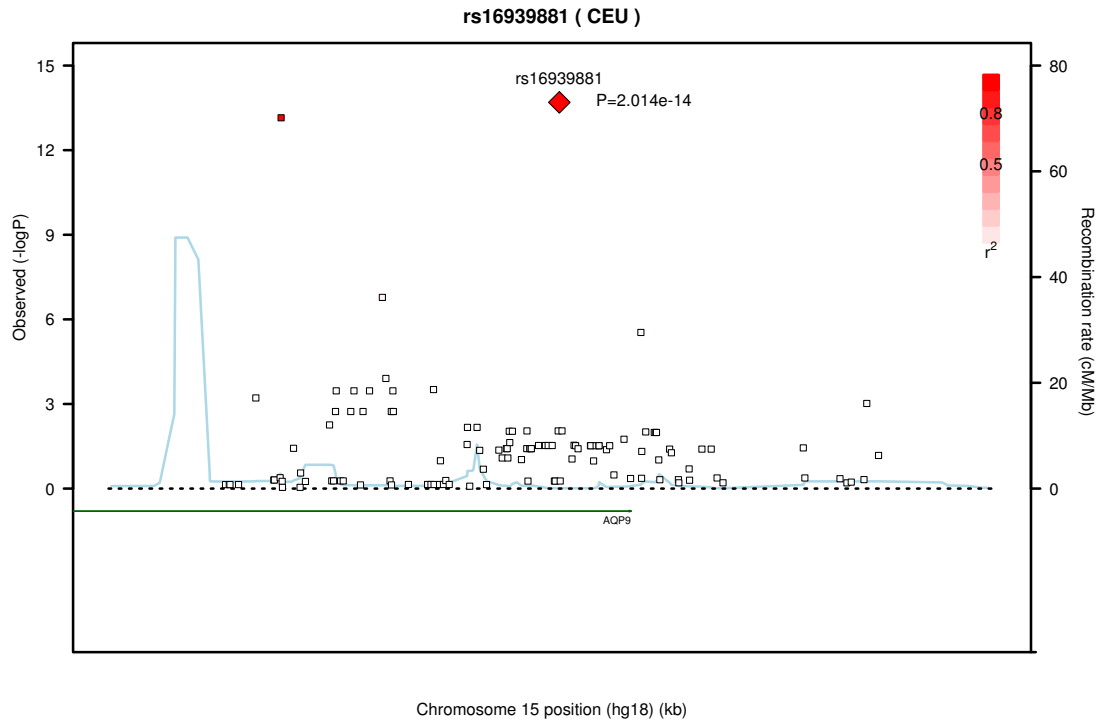

***EREG* locus – Metabolite network 4**

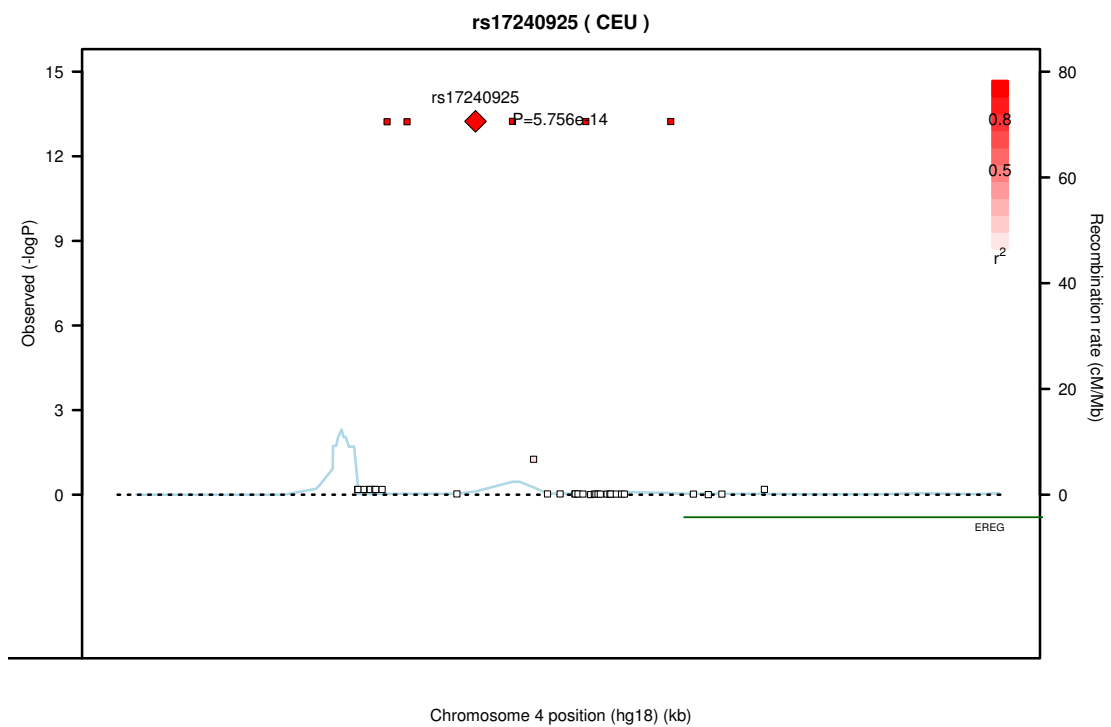



**GC locus – Metabolite network 4**

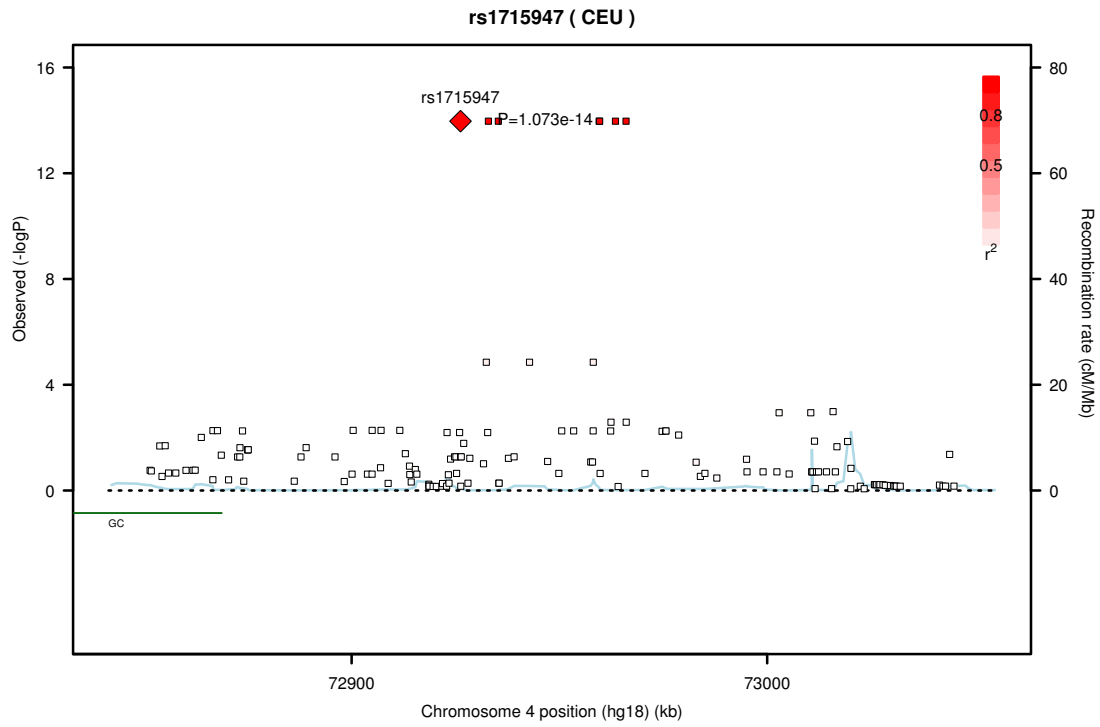

**PF4, PPBP, CXCL5 locus – Metabolite network 4**

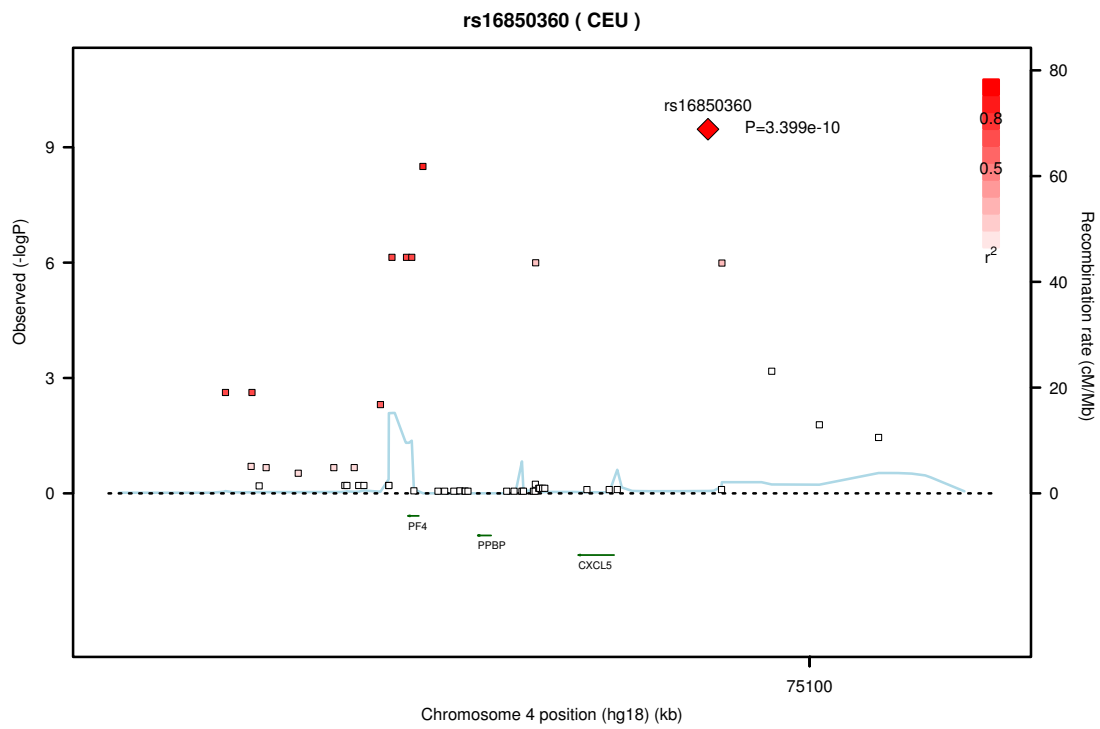

## Metabolite Network 5

Composition of network (N = 4):

| Metabolite abbreviation | Full description                            |
|-------------------------|---------------------------------------------|
| FAw3                    | Omega-3 fatty acids                         |
| PUFA                    | Other polyunsaturated fatty acids than 18:2 |
| DHA                     | 22:6, docosahexaenoic acid (DHA)            |
| Tot-PG                  | Total phosphoglycerides                     |

Intra-correlation of network:

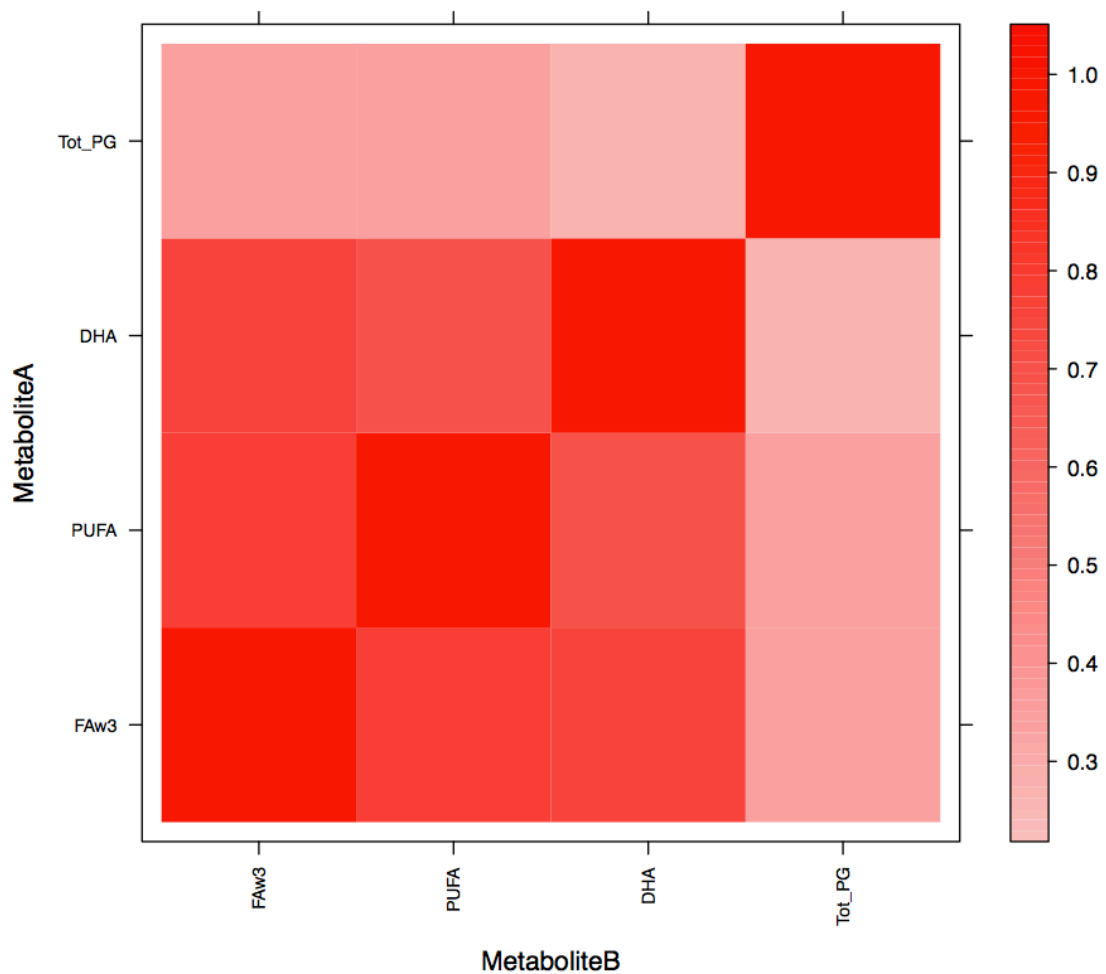

**QQ plots:**

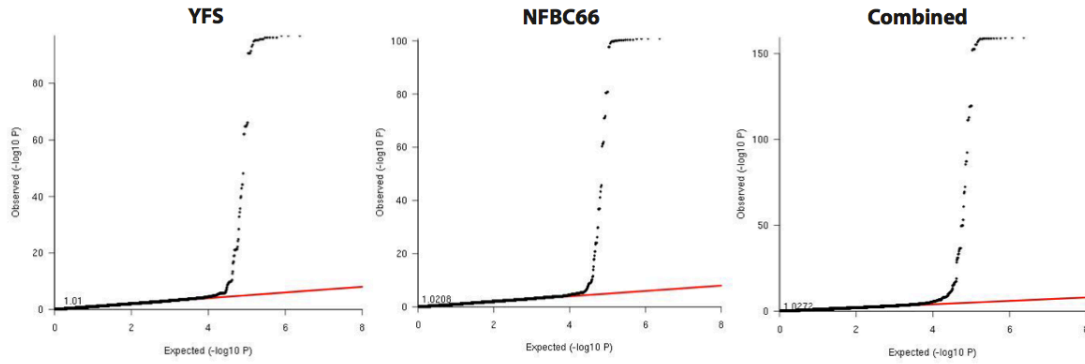

**Comparison of multivariate and univariate P values:**

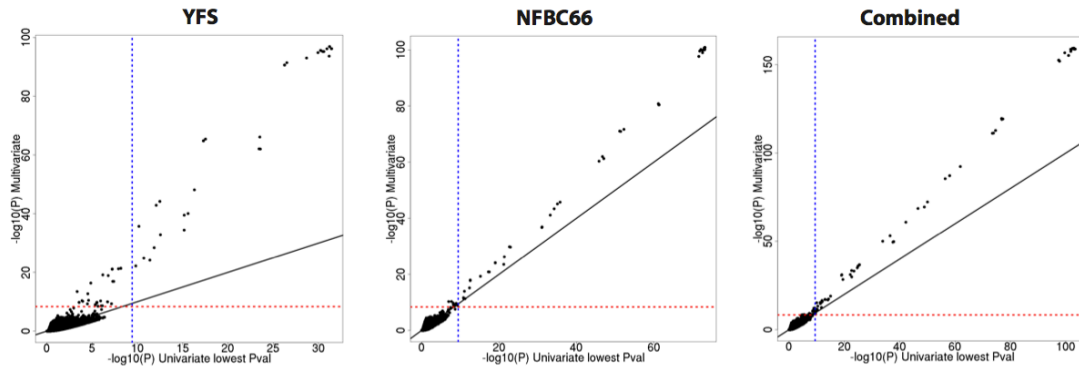

**Genome-wide Manhattan plot for combined analysis:**

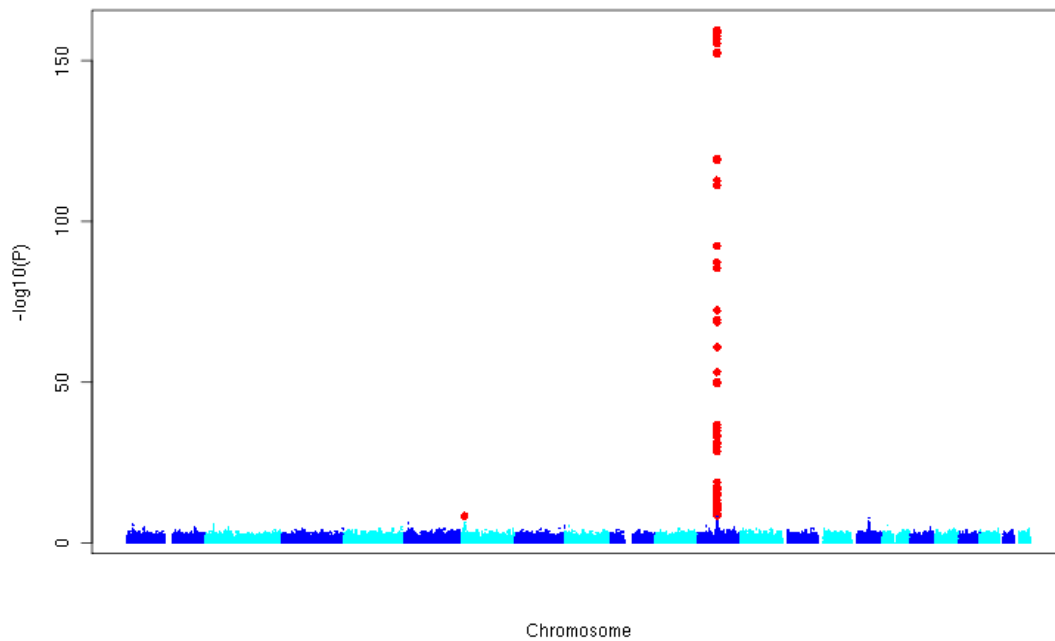

## Metabolite Network 6

Composition of network (N = 4):

| Metabolite abbreviation | Full description  |
|-------------------------|-------------------|
| bOHBuO                  | 3-hydroxybutyrate |
| AcAcO                   | Acetoacetate      |
| Cit                     | Citrate           |
| GloI                    | Glycerol          |

Intra-correlation of network:

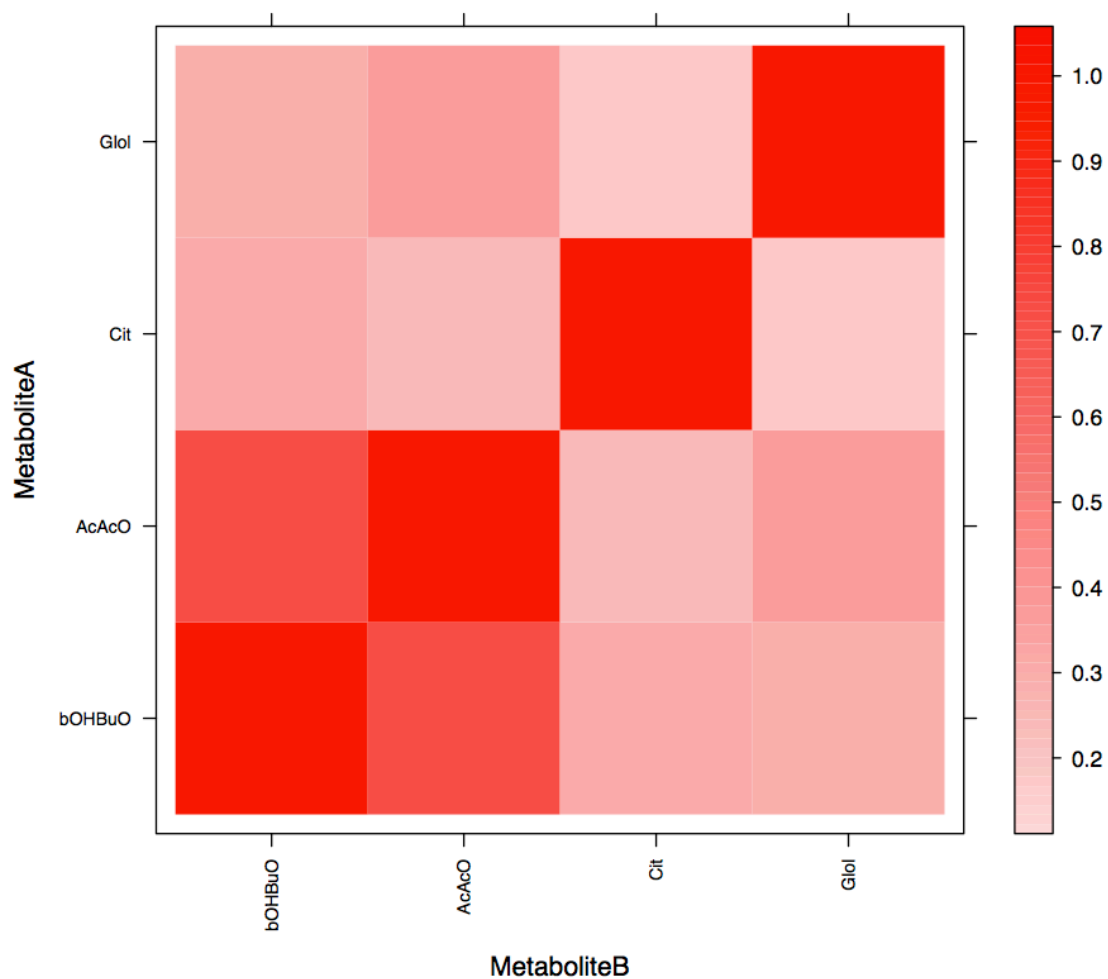

**QQ plots:**

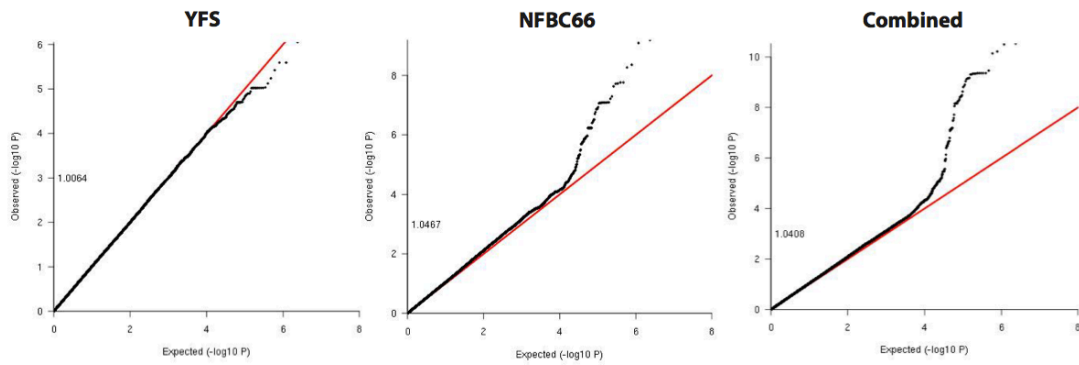

**Comparison of multivariate and univariate  $P$  values:**

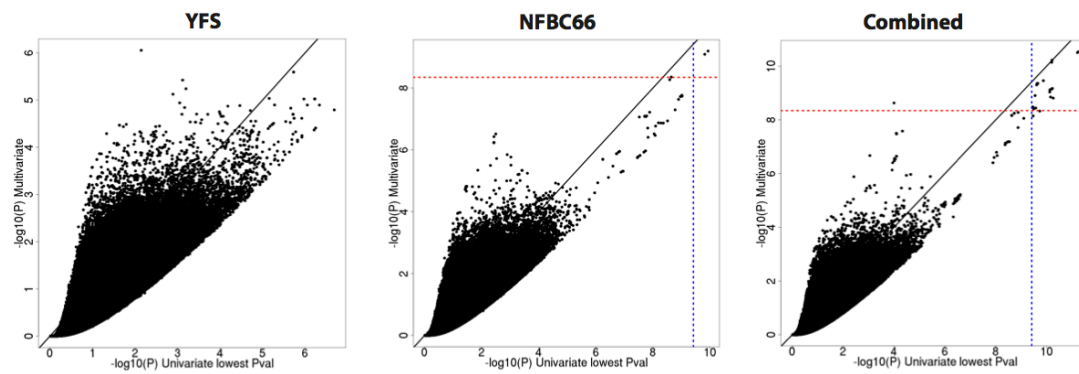

**Genome-wide Manhattan plot for combined analysis:**

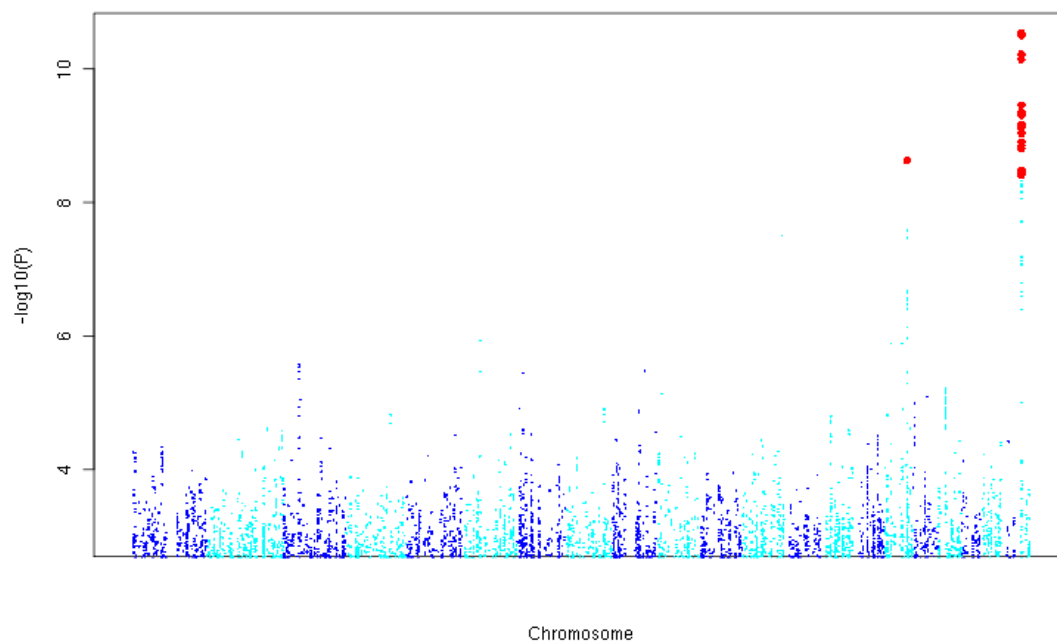

## Metabolite Network 7

Composition of network (N = 3):

| Metabolite abbreviation | Full description |
|-------------------------|------------------|
| Ala                     | Alanine          |
| Lac                     | Lactate          |
| Pyr                     | Pyruvate         |

Intra-correlation of network:

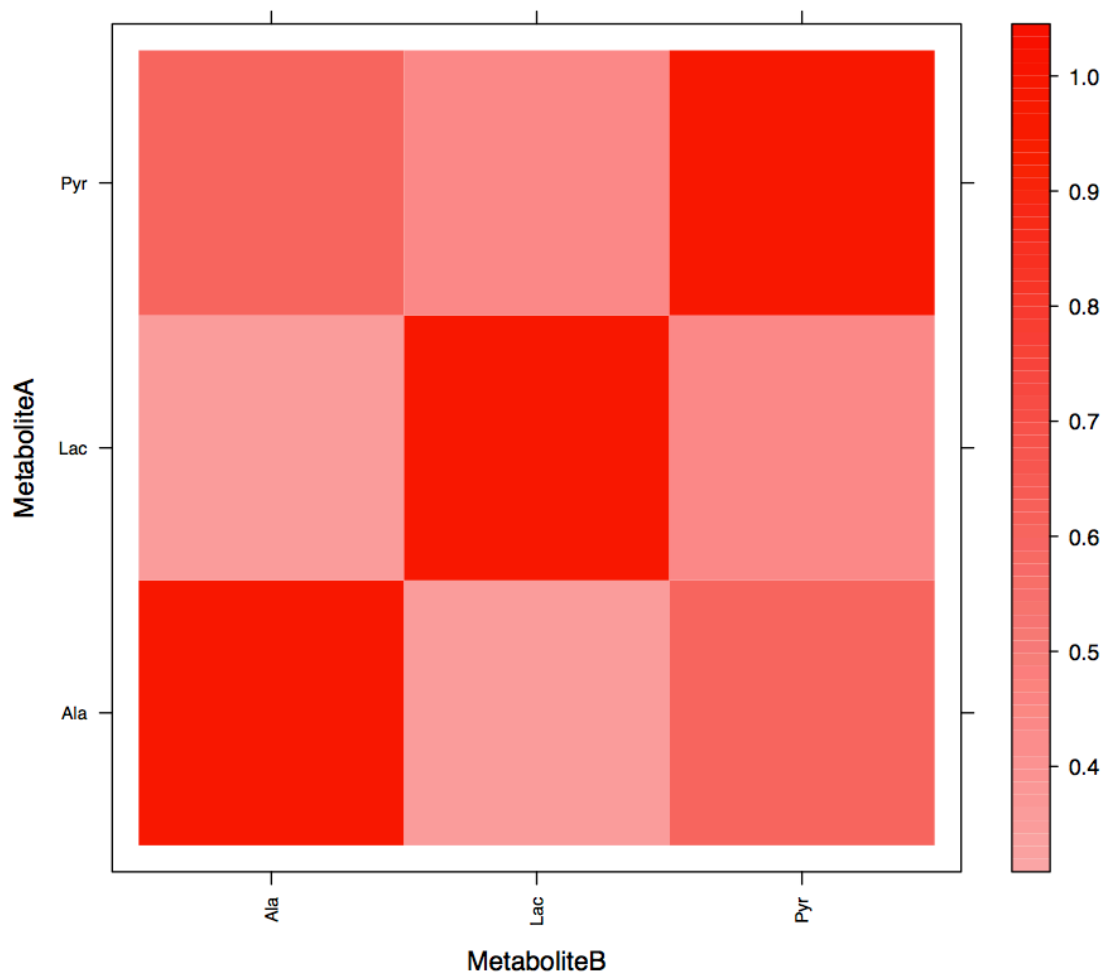

**QQ plots:**

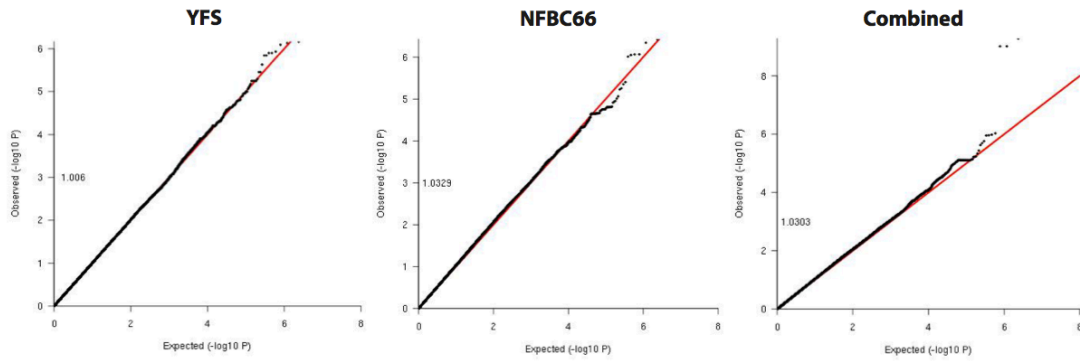

**Comparison of multivariate and univariate P values:**

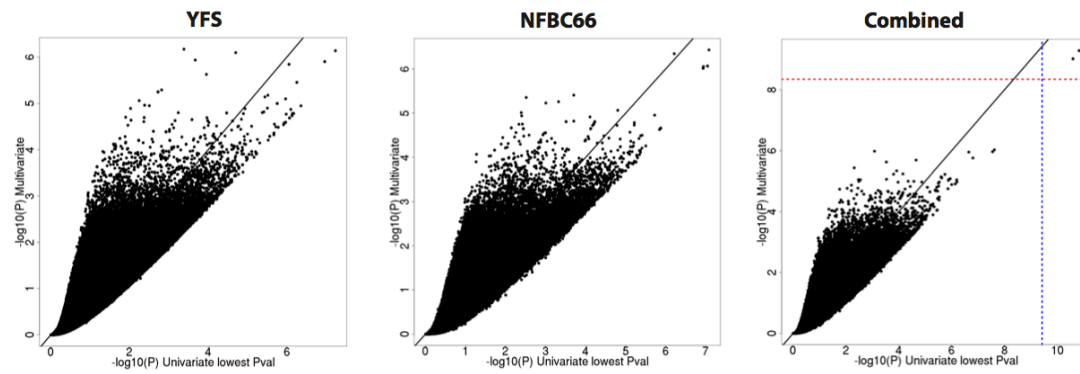

**Genome-wide Manhattan plot for combined analysis:**

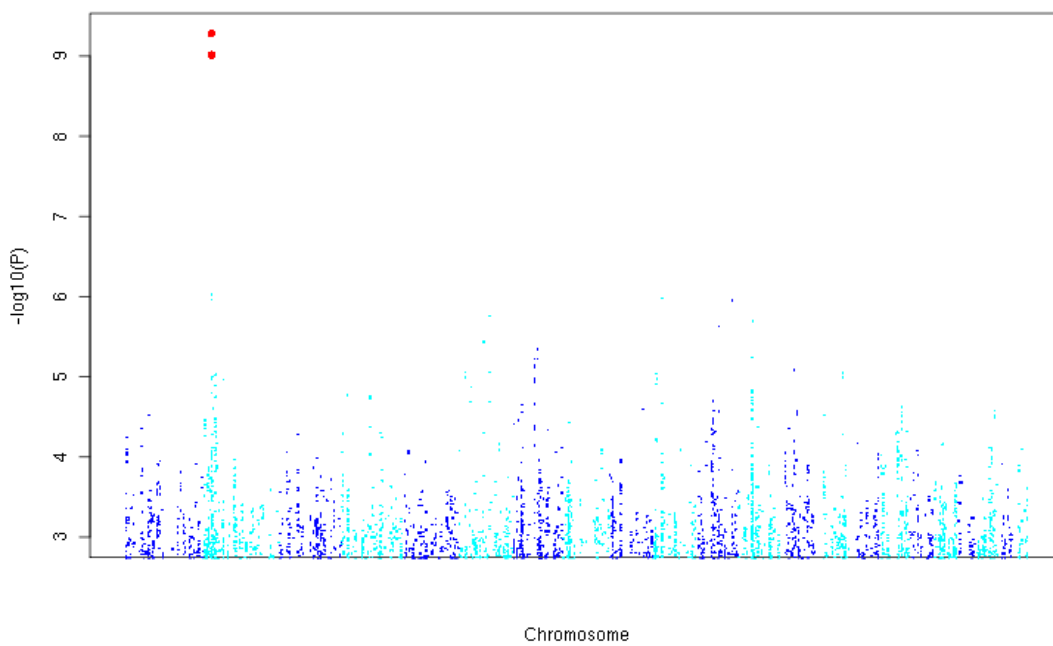

## Metabolite Network 8

Composition of network (N = 3):

| Metabolite abbreviation | Full description |
|-------------------------|------------------|
| Crea                    | Creatinine       |
| Glc                     | Glucose          |
| Gln                     | Glutamine        |

Intra-correlation of network:

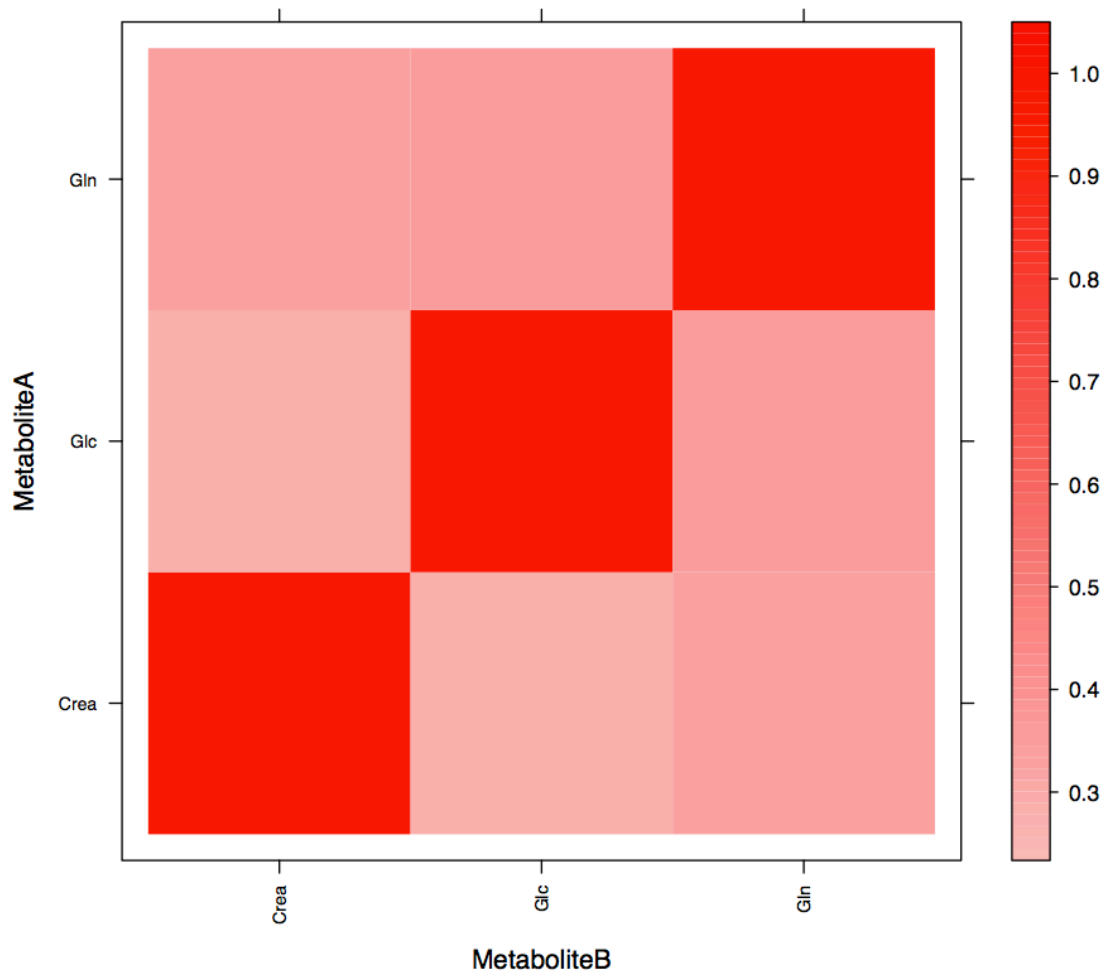



**QQ plots:**

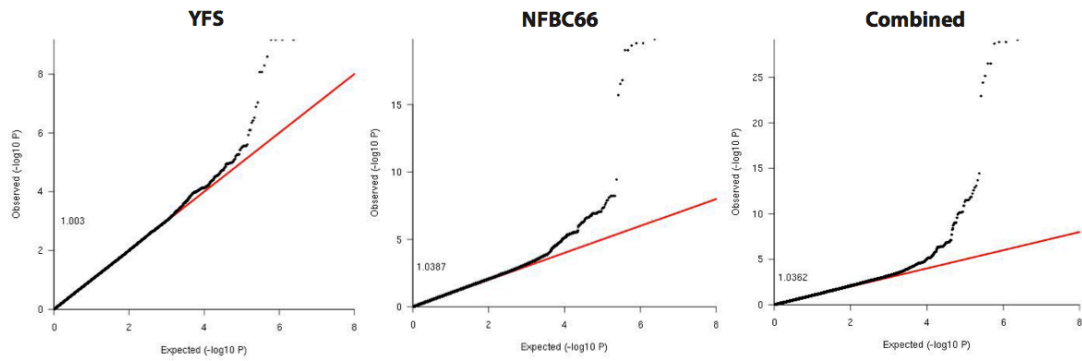

**Comparison of multivariate and univariate  $P$  values:**

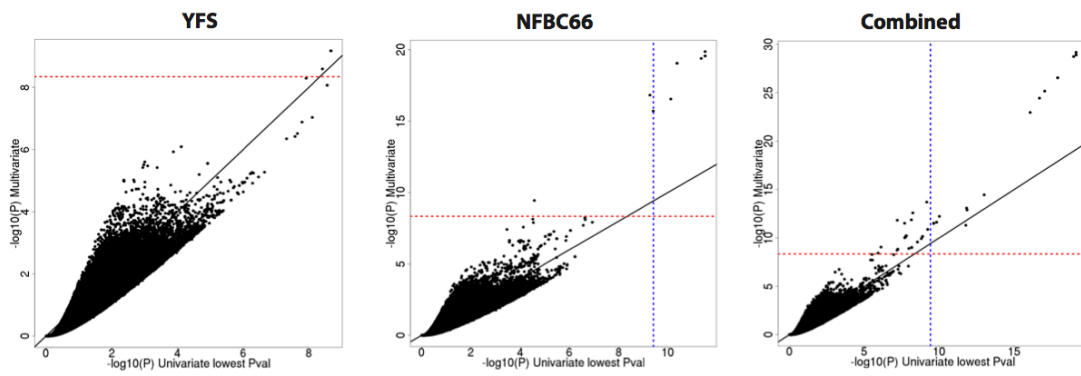

**Genome-wide Manhattan plot for combined analysis:**

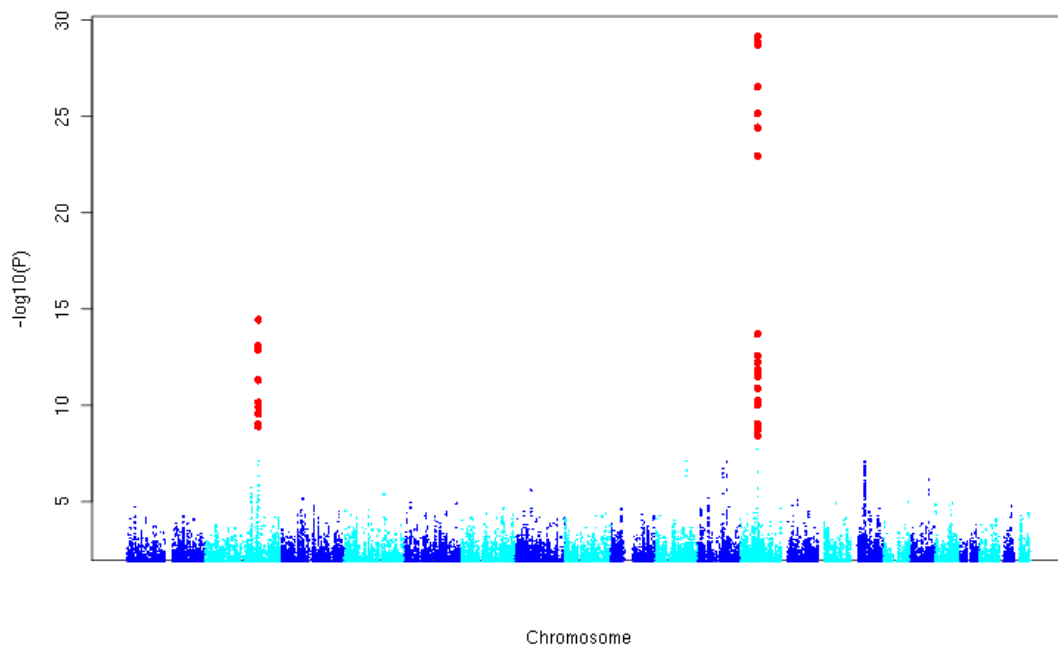

## Metabolite Network 9

Composition of network (N = 2):

| Metabolite abbreviation | Full description                                                         |
|-------------------------|--------------------------------------------------------------------------|
| CH2-FA                  | Average number of methylene groups in a fatty acid chain                 |
| FALen                   | Description of average fatty acid chain length, not actual carbon number |

Intra-correlation of network:

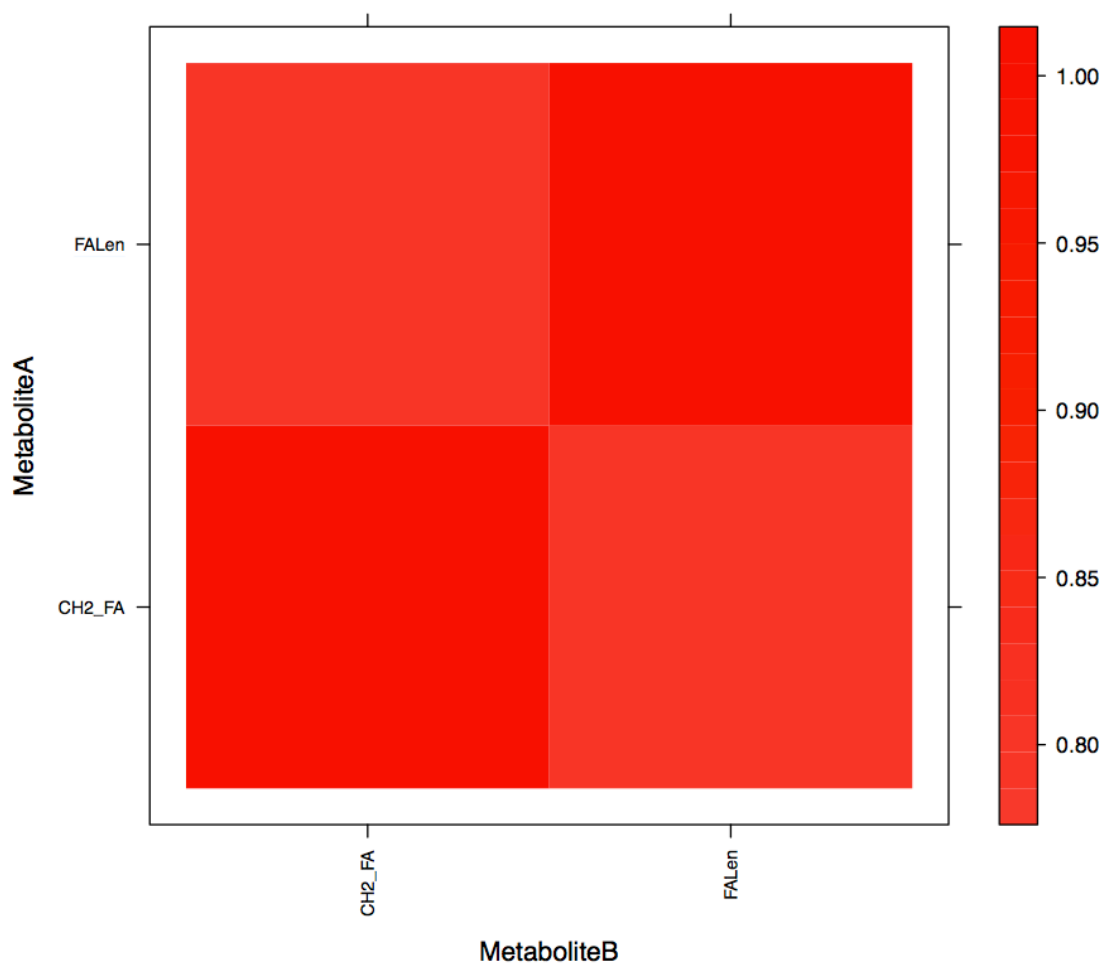

**QQ plots:**

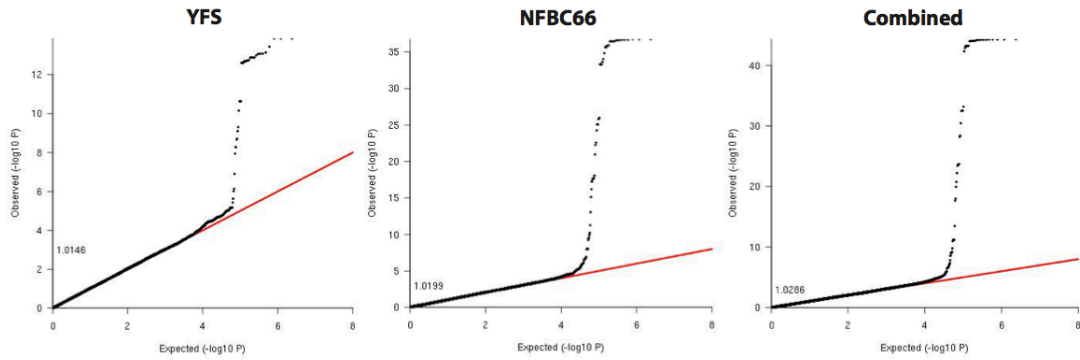

**Comparison of multivariate and univariate  $P$  values:**

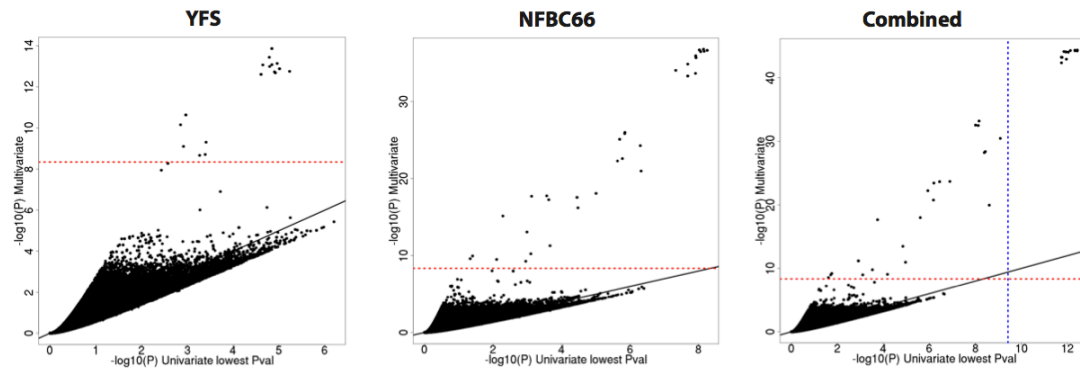

**Genome-wide Manhattan plot for combined analysis:**

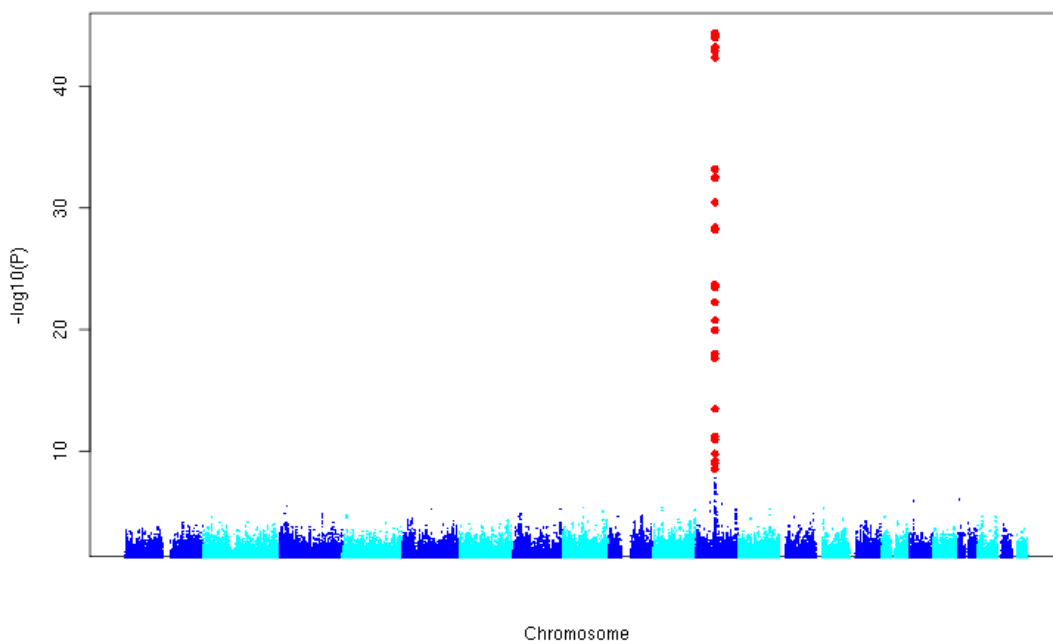

## Metabolite Network 10

Composition of network (N = 2):

| Metabolite abbreviation | Full description                                     |
|-------------------------|------------------------------------------------------|
| LDL-D                   | Mean diameter for LDL particles                      |
| DB-FA                   | Average number of double bonds in a fatty acid chain |

Intra-correlation of network:

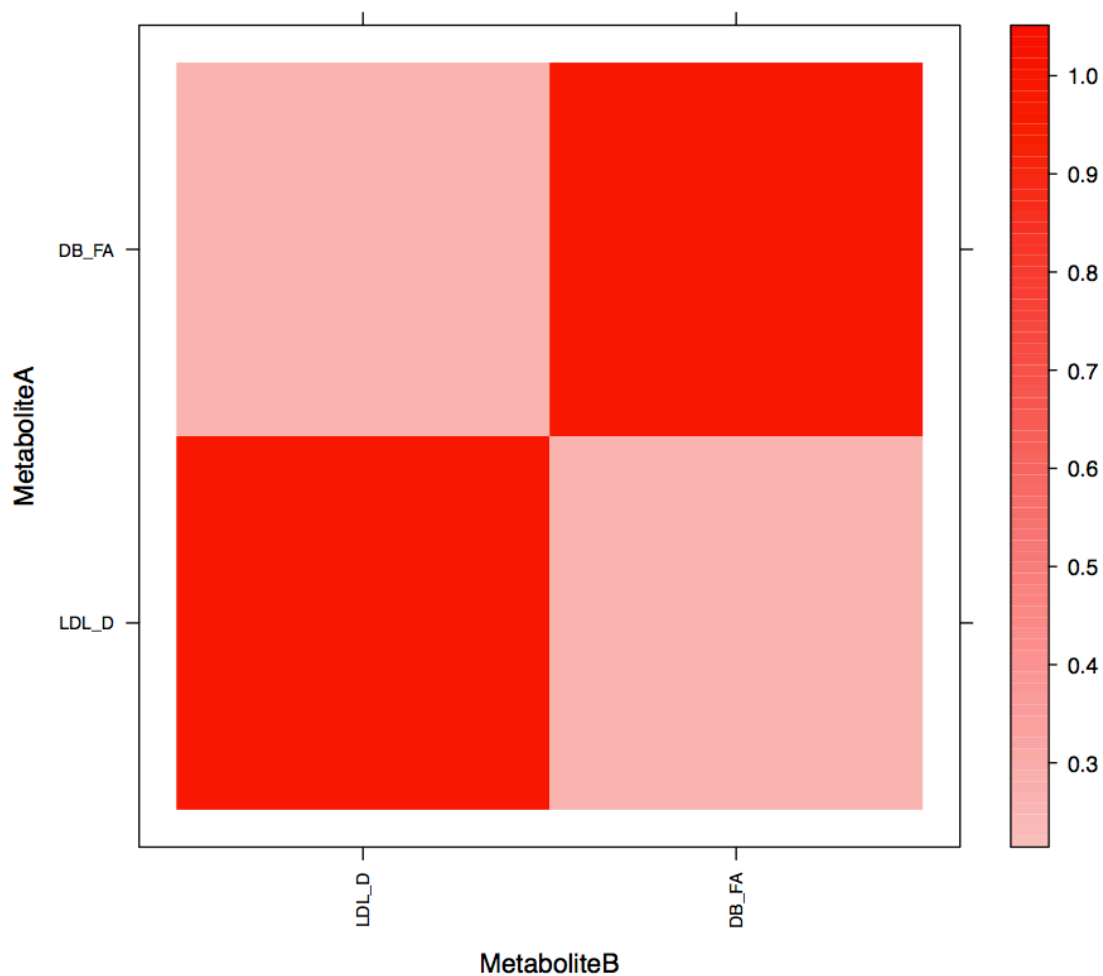

**QQ plots:**

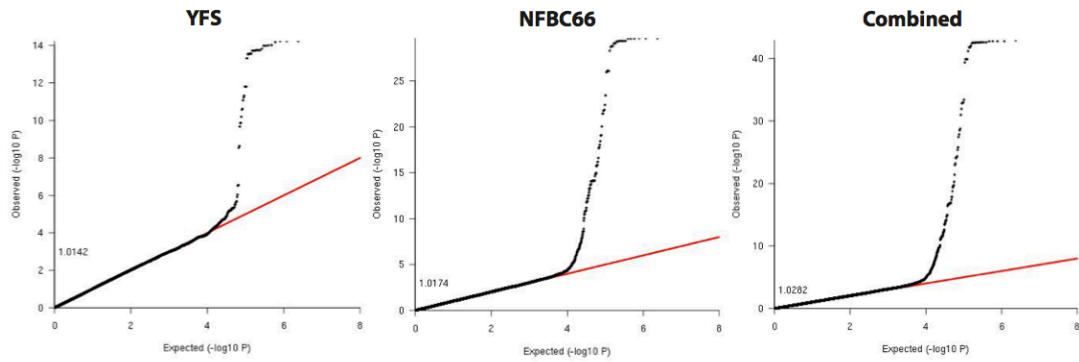

**Comparison of multivariate and univariate P values:**

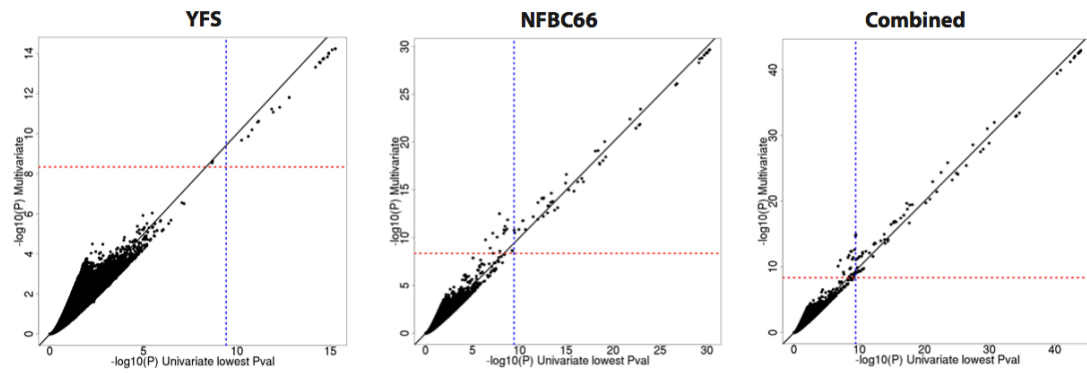

**Genome-wide Manhattan plot for combined analysis:**

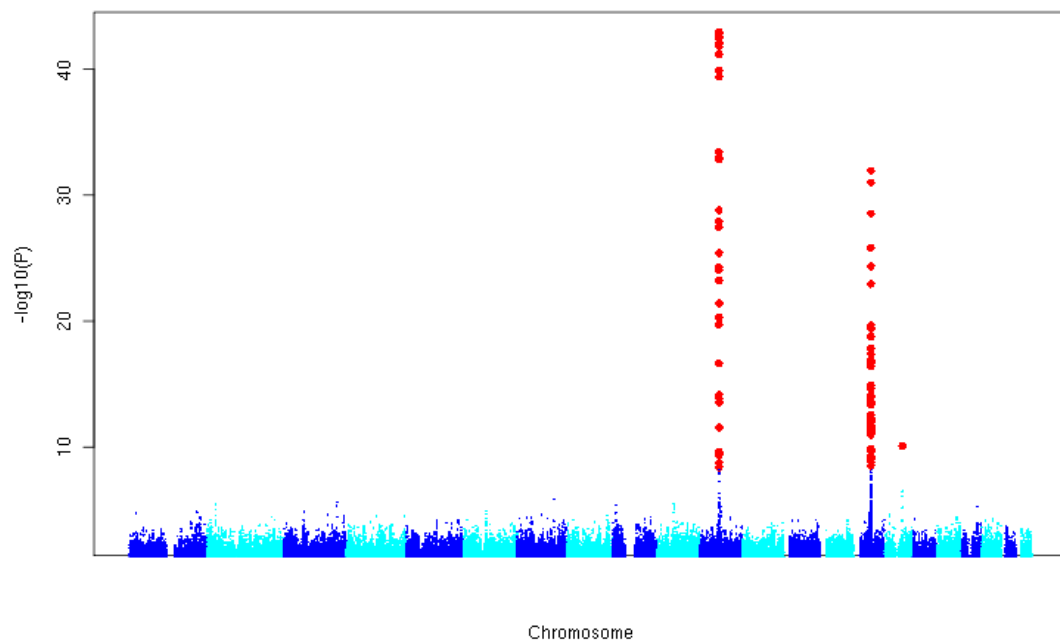

## Metabolite Network 11

Composition of network (N = 2):

| Metabolite abbreviation | Full description |
|-------------------------|------------------|
| AcO                     | Acetate          |
| Urea                    | Urea             |

Intra-correlation of network:

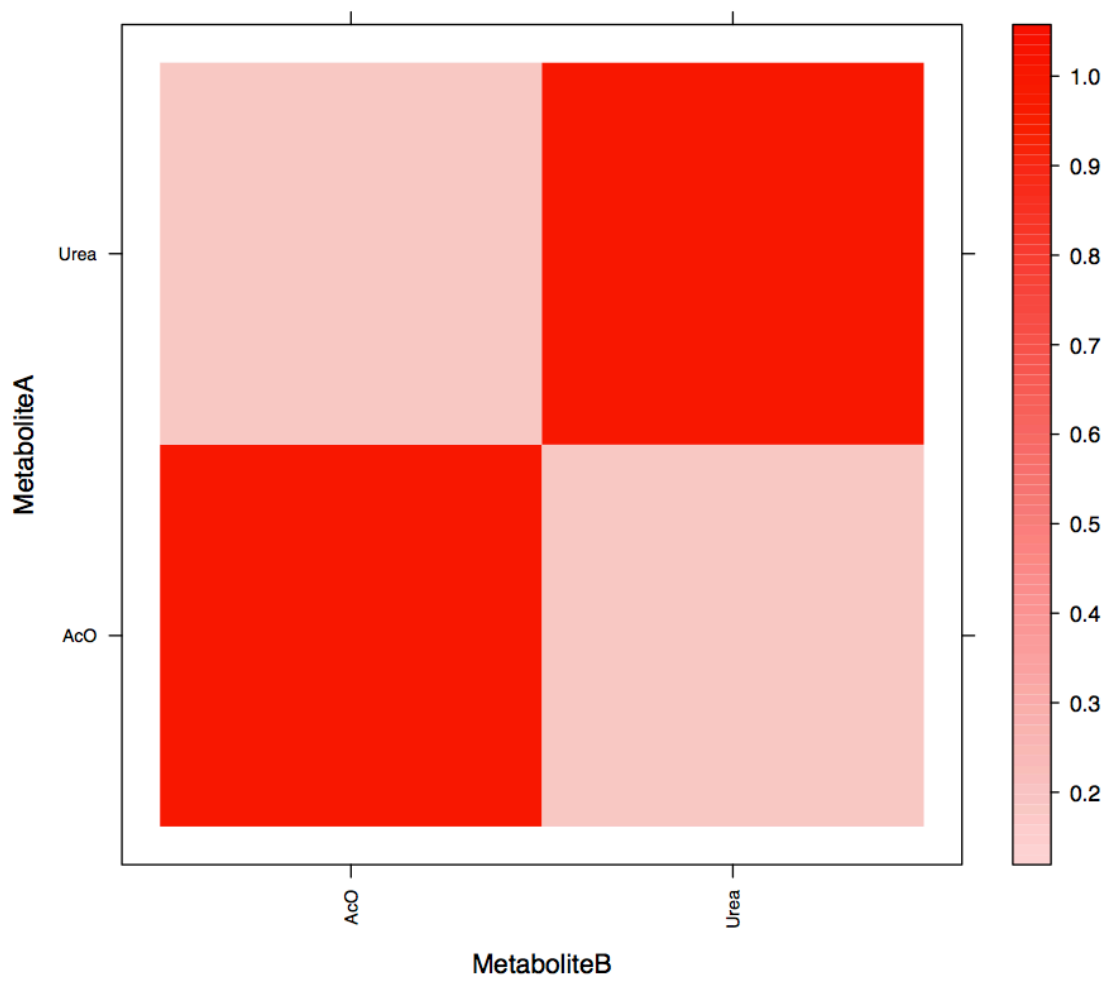

**QQ plots:**

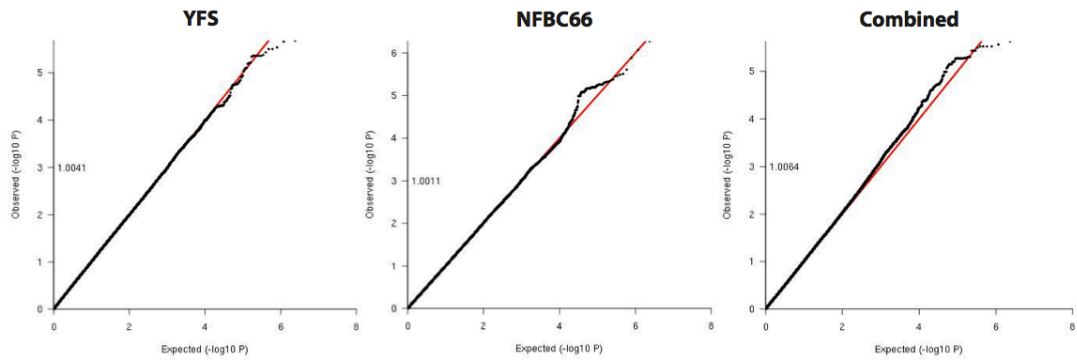

**Comparison of multivariate and univariate P values:**

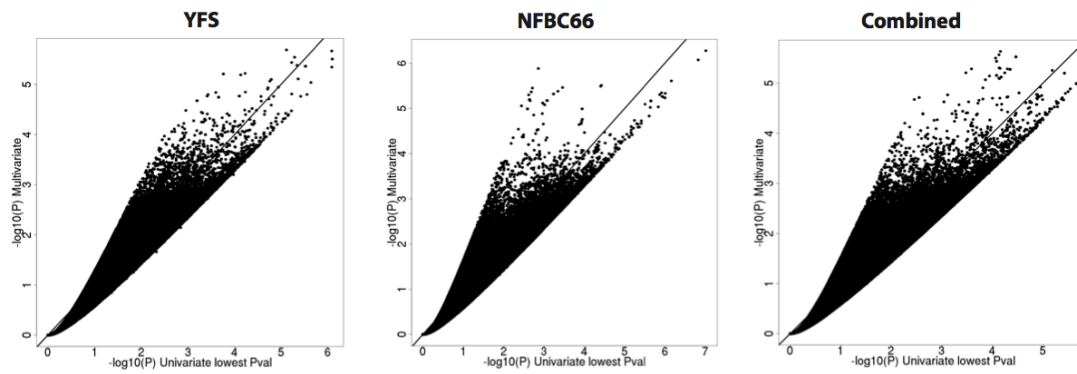

**Genome-wide Manhattan plot for combined analysis:**

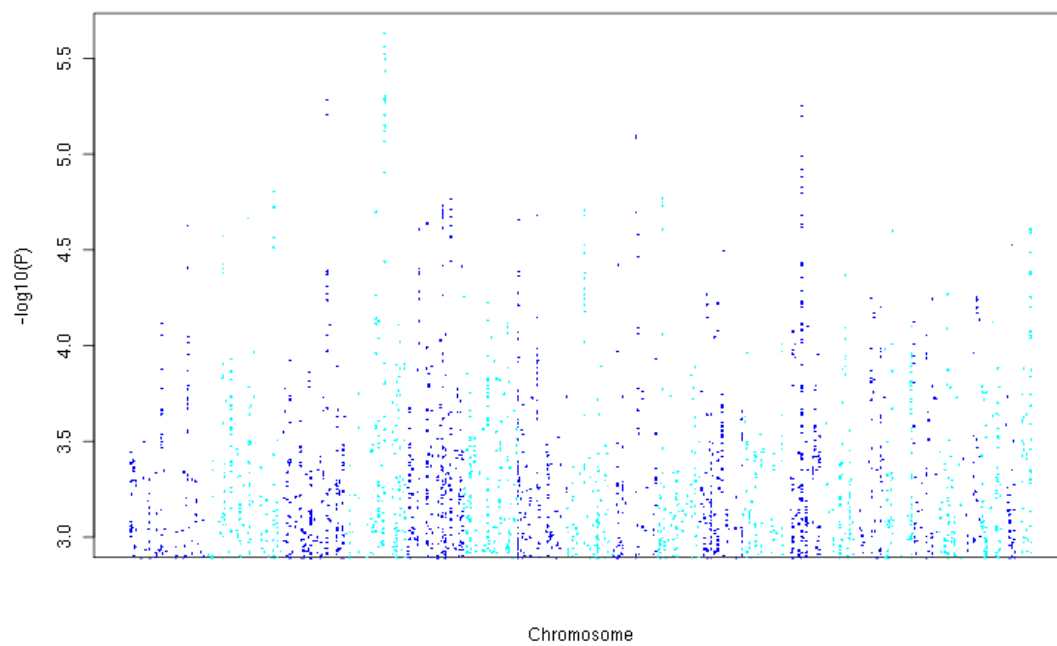

Supplement: pgen.1002907.s008.pdf [file pgen.1002907.s008.pdf]
