# Supplementary material for: Novel Loci for Metabolic Networks and Multi-Tissue Expression Studies Reveal Genes for Atherosclerosis
Source: PLoS Genet. 2012 Aug 16;8(8):e1002907. doi: 10.1371/journal.pgen.1002907 (PMC3420921; doi:10.1371/journal.pgen.1002907)
Supplement: Table S4 — Expression of novel candidate genes is associated with metabolite levels. (XLSX) [file pgen.1002907.s012.xlsx]

## Sheet: Sheet1
Gene	Chr	Pvalue	Beta (95% CI)	Metabolite
AQP9	15q22.1	8.48e-09	-0.61 (-0.82 - -0.41)	XL-HDL-TG
AQP9	15q22.1	7.16e-05	-0.43 (-0.63 - -0.22)	MobCH3
SERPINA1	14q32.13	6.46e-05	-0.51 (-0.75 - -0.26)	MobCH3
SERPINA1	14q32.13	0.000247	-0.49 (-0.76 - -0.23)	L-VLDL-CE
SERPINA1	14q32.13	0.000248	-0.51 (-0.78 - -0.24)	XXL-VLDL-PL
SERPINA1	14q32.13	0.000263	-0.48 (-0.73 - -0.22)	L-VLDL-C
SERPINA1	14q32.13	0.000316	-0.37 (-0.58 - -0.17)	XL-HDL-TG
SERPINA1	14q32.13	0.000398	-0.37 (-0.57 - -0.16)	Free-C
SERPINA1	14q32.13	0.0004	-0.37 (-0.57 - -0.17)	Serum-C
SERPINA1	14q32.13	0.000421	1.14 (0.51 - 1.77)	CH2/DB
